# Supplementary material for: Pd/β-cyclodextrin-catalyzed C–H functionalization in water: a greener approach to regioselective arylation of (NH)-indoles with aryl bromides
Source: Royal Society of Chemistry journal article supplement (doi:10.1039/d1nj03400f), 2021-01-01

*Supporting Information for*

**Pd/ $\beta$ -cyclodextrin-catalyzed C-H functionalization in water:  
a greener approach to regioselective arylation of  
(NH)-indoles with aryl bromides**

Peng Xu and Xin Hong Duan\*<sup>[a]</sup>

College of Science, Beijing Forestry University, Beijing 100083, China.

**Table of Contents**

|                             |           |
|-----------------------------|-----------|
| <b>1 Experiment Details</b> | <b>S2</b> |
| <b>2 References</b>         | <b>S8</b> |
| <b>3 NMR Spectra</b>        | <b>S9</b> |

## 1. Experiment Details

### 1) General Methods

All reagents were obtained from Sigma-Aldrich Chemical Co. or Alfa Aesar.  $^1\text{H-NMR}$  spectra were recorded on a Bruker Avance DPX 400 (400 MHz) or 500 (500 MHz) spectrometer using  $\text{CDCl}_3$  or  $\text{DMSO-d}_6$  as the solvent. The chemical shifts are reported in  $\delta$  (ppm) values. Coupling constants are reported in hertz (Hz). The following abbreviations are used to designate the multiplicities: s = singlet, d = doublet, t = triplet, q = quartet and m = multiplet.  $^{13}\text{C-NMR}$  spectra were recorded on a Bruker Avance DPX 400 (400 MHz) or 500 (500 MHz) spectrometer at 100 or 125 MHz using  $\text{CDCl}_3$  as the solvent. All compounds were characterized by  $^1\text{H-NMR}$ ,  $^{13}\text{C-NMR}$  and melting point determination (for solids); melting points were uncorrected.

### 2) General procedures

#### (1) Procedure for 3-arylindoles (1a-u)

$\text{Na}_2\text{PdCl}_4$  (14.7 mg, 5.0 mol%),  $\beta$ -cyclodextrin ( $\beta$ -CD) (56.8 mg, 5.0 mol%), KOH (112 mg, 2.0 mmol) and 3.0 ml  $\text{H}_2\text{O}$  in 25 ml round-bottom flask equipped with condenser and magnetic stirring were preheated at 60  $^\circ\text{C}$  for 0.5h. Then, an indole (1.0 mmol) and an aryl bromide (1.0 mmol) were added. The resulting reaction mixture was stirred and heated at 80  $^\circ\text{C}$  until the coupling reaction reached completion (monitored by GC-MS). After extracted with EtOAc (3 x 15 mL), dried over  $\text{Na}_2\text{SO}_4$ , and concentrated in vacuo, the product was obtained by purification with silica gel flash chromatography. Spectral data matches that reported in the literature.

#### (2) Screening of the bases of C2-selective arylation

Table S1. Optimization of the bases.

| Entry | Base                     | Time (h) | Yield (2a/1a, %) |
|-------|--------------------------|----------|------------------|
| 1     | $\text{Na}_2\text{CO}_3$ | 8        | 32/46            |
| 2     | $\text{K}_2\text{CO}_3$  | 8        | 39/49            |
| 3     | <b>KOAc</b>              | <b>4</b> | <b>75/10</b>     |
| 4     | NaOAc                    | 4        | 52/14            |
| 5     | LiOH                     | 2        | 35/47            |
| 6     | NaOH                     | 2        | 26/52            |

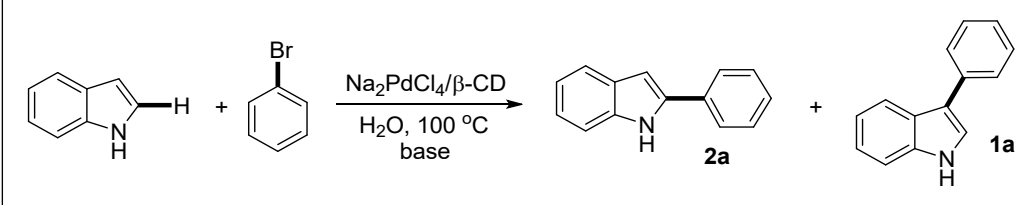

#### (3) Procedure for 2-arylindoles (2a-i)

$\text{Na}_2\text{PdCl}_4$  (14.7 mg, 5.0 mol%),  $\beta$ -cyclodextrin ( $\beta$ -CD) (56.8 mg, 5.0 mol%), KOAc (196 mg, 2.0 mmol) and 3.0 ml  $\text{H}_2\text{O}$  in 25 ml round-bottom flask equipped with condenser and magnetic stirring were preheated at 60  $^\circ\text{C}$  for 0.5h. Then, an indole (1.0 mmol) and an aryl bromide (1.0 mmol) were added. The resulting reaction mixture was stirred and heated at 100  $^\circ\text{C}$  until the coupling reaction reached completion (monitored by GC-

MS). After extracted with EtOAc (3 x 15 mL), dried over Na<sub>2</sub>SO<sub>4</sub>, and concentrated in vacuo, the product was obtained by purification with silica gel flash chromatography. Spectral data matches that reported in the literature.

#### (4) Procedure for the coupling of 5-nitroindole and PhBr

Na<sub>2</sub>PdCl<sub>4</sub> (14.7 mg, 5.0 mol%), β-cyclodextrin (β-CD) (56.8 mg, 5.0 mol%), KOH (112 mg, 2.0 mmol) and 3.0 ml H<sub>2</sub>O in 25 ml round-bottom flask equipped with condenser and magnetic stirring were preheated at 60 °C for 0.5h. Then, 5-nitroindole (1.0 mmol) and PhBr (1.0 mmol) were added. The reaction mixture was stirred and heated at 80 °C for 24 hours and the reaction did not proceed under the conditions (monitored by GC-MS).

#### (5) Procedure for the coupling of *N*-methylindole and PhBr

Na<sub>2</sub>PdCl<sub>4</sub> (14.7 mg, 5.0 mol%), β-cyclodextrin (β-CD) (56.8 mg, 5.0 mol%) or SDS (57.6 mg, 20.0 mol%), KOH (112 mg, 2.0 mmol) and 10 ml H<sub>2</sub>O in 25 ml round-bottom flask equipped with condenser and magnetic stirring were preheated at 60 °C for 0.5h. Then, *N*-methylindole (1.0 mmol) and PhBr (1.0 mmol) were added. The resulting reaction mixture was stirred and heated at 100 °C for 24 hours. After extracted with EtOAc (3 x 15 mL), dried over Na<sub>2</sub>SO<sub>4</sub>, and concentrated in vacuo, the product was obtained by purification with silica gel flash chromatography.

#### (6) Procedure for the coupling of 2- or 3-phenylindole and PhBr

Na<sub>2</sub>PdCl<sub>4</sub> (14.7 mg, 5.0 mol%), β-cyclodextrin (β-CD) (56.8 mg, 5.0 mol%), KOH (112 mg, 2.0 mmol) and 10 ml H<sub>2</sub>O in 25 ml round-bottom flask equipped with condenser and magnetic stirring were preheated at 60 °C for 0.5h. Then, 2- or 3-phenylindole (1.0 mmol) and PhBr (1.0 mmol) were added. The resulting reaction mixture was stirred and heated at 100 °C for 24 hours. After extracted with EtOAc (3 x 15 mL), dried over Na<sub>2</sub>SO<sub>4</sub>, and concentrated in vacuo, the product was obtained by purification with silica gel flash chromatography.

#### (7) The proposed Na<sub>2</sub>PdCl<sub>4</sub>/β-CD-catalyzed mechanism of C2-arylation of indole with PhBr in water.

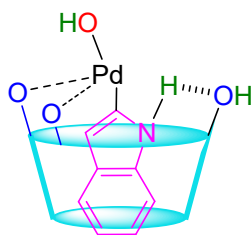

**Fig. S1** the C2-palladation indole intermediate.

#### 4) Characterization data

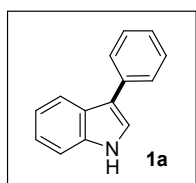

##### 3-Phenyl-1H-indole<sup>[1]</sup> (1a)

White solid, m.p. 108-109 °C. <sup>1</sup>H-NMR (400 MHz, CDCl<sub>3</sub>): δ = 8.05 (br s, 1H), 7.94 (d, *J* = 7.7 Hz, 1H), 7.65 (d, *J* = 7.3 Hz, 2H), 7.45-7.41 (t, 2H), 7.35 (d, *J* = 7.5 Hz, 1H), 7.28 (d, *J* = 7.5 Hz, 1H), 7.26-7.16 (m, 3H). <sup>13</sup>C-NMR (100 MHz, CDCl<sub>3</sub>): δ = 136.8, 135.7, 129.0, 127.6, 126.1, 125.8, 122.5, 122.1, 120.5, 119.9, 118.3, 111.6.

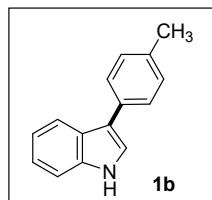

##### 3-(p-Tolyl)-1H-indole<sup>[2]</sup> (1b)

Pale-yellow solid, m.p. 112-113 °C. <sup>1</sup>H-NMR (400 MHz, CDCl<sub>3</sub>): δ = 8.05 (br s, 1H), 7.93 (d, *J* = 7.8 Hz, 1H), 7.56 (d, *J* = 8.1 Hz, 2H), 7.36 (t, *J* = 8.9 Hz, 1H), 7.26-7.23 (m, 4H), 7.20-7.17 (m, 1H), 2.39 (s, 3H). <sup>13</sup>C-NMR (100 MHz, CDCl<sub>3</sub>): δ = 136.6, 135.6, 132.5, 129.5, 127.4, 125.7, 122.3, 122.2, 121.5, 120.2, 120.1, 119.8, 118.1, 111.4, 21.2.

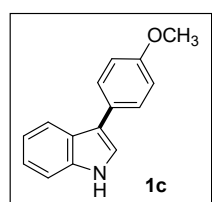

##### 3-(4-Methoxyphenyl)-1H-indole<sup>[3]</sup> (1c)

Pale-yellow solid, m.p. 130-131 °C. <sup>1</sup>H-NMR (500 MHz, CDCl<sub>3</sub>): δ = 8.13 (br s, 1H), 7.95 (d, *J* = 5.0 Hz, 1H), 7.63 (dd, *J* = 1.4, 4.8 Hz, 2H), 7.40 (t, *J* = 6.6 Hz, 1H), 7.29-7.22 (m, 3H), 7.05 (dd, *J* = 1.4, 3.7 Hz, 2H), 3.89 (s, 3H). <sup>13</sup>C-NMR (125 MHz, CDCl<sub>3</sub>): δ = 158.2, 136.7, 128.7, 128.3, 126.0, 122.4, 121.4, 120.3, 119.9, 118.0, 114.4, 111.5, 55.5

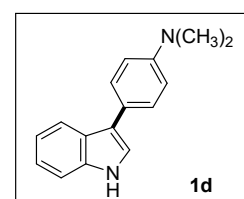

##### 3-(4-N,N-dimethylaminophenyl)-1H-indole<sup>[4]</sup> (1d)

Pale-yellow solid, m.p. 88-90 °C. <sup>1</sup>H-NMR (400 MHz, CDCl<sub>3</sub>): δ = 8.15 (br s, 1H), 7.91 (dd, *J* = 1.2, 1.0 Hz, 1H), 7.55 (d, *J* = 8.8 Hz, 2H), 7.39-7.32 (m, 2H), 7.24-7.14 (m, 2H), 6.86 (d, *J* = 8.8 Hz, 2H), 2.98 (s, 6H). <sup>13</sup>C-NMR (100 MHz, CDCl<sub>3</sub>): δ = 136.5, 130.8, 128.8, 128.3, 128.2, 126.0, 122.1, 120.7, 119.9, 119.8, 118.3, 113.3, 112.3, 111.3, 40.9.

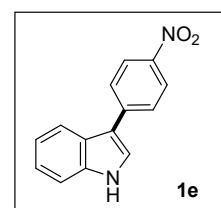

##### 3-(4-Nitrophenyl)-1H-indole<sup>[2]</sup> (1e)

Light yellow solid, m.p. 149-151 °C. <sup>1</sup>H-NMR (400 MHz, CDCl<sub>3</sub>): δ = 8.48 (br s, 1H), 8.22 (d, *J* = 8.0 Hz, 2H), 7.88 (d, *J* = 8.0 Hz, 1H), 7.74 (d, *J* = 8.0 Hz, 2H), 7.45-7.40 (m, 2H), 7.26-7.19 (m, 2H). <sup>13</sup>C-NMR (100 MHz, CDCl<sub>3</sub>): δ = 145.6, 142.8, 136.9, 127.1, 125.1, 124.3, 123.7, 123.2, 121.3, 119.5, 116.3, 111.9.

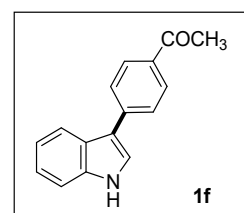

##### 3-(4-Acetylphenyl)-1H-indole<sup>[4]</sup> (1f)

White solid, m.p. 140-141 °C. <sup>1</sup>H-NMR (400 MHz, CDCl<sub>3</sub>): δ = 8.61 (br s, 1H), 8.00 (d, *J* = 8.0 Hz, 2H), 7.94 (d, *J* = 7.3 Hz, 1H), 7.73 (d, *J* = 8.0 Hz, 2H), 7.40 (d, *J* = 7.6 Hz, 2H), 7.26-7.20 (m, 2H), 2.60 (s, 3H). <sup>13</sup>C-NMR (100 MHz, CDCl<sub>3</sub>): δ = 136.7, 134.1, 131.6, 128.9, 128.6, 125.5, 122.6, 121.9, 120.5, 119.6, 117.2, 111.5, 65.7.

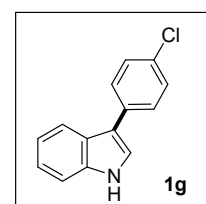

##### 3-(4-Chlorophenyl)-1H-indole<sup>[5]</sup> (1g)

White solid, m.p. 138-140 °C. <sup>1</sup>H-NMR (400 MHz, CDCl<sub>3</sub>): δ = 8.19 (br s, 1H), 7.87 (d, *J* = 7.9 Hz, 1H), 7.57 (d, *J* = 7.9 Hz, 2H), 7.39-7.28 (t, 3H), 7.26 (s, 1H), 7.22-7.18 (m, 2H). <sup>13</sup>C-NMR (100 MHz, CDCl<sub>3</sub>): δ = 136.7, 134.1, 131.6, 129.0, 128.6, 125.6, 122.6, 122.0, 120.6, 119.6, 117.1, 111.6

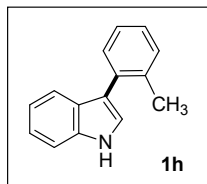

### 3-(*o*-Tolyl)-1*H*-indole<sup>[6]</sup> (1h)

Colorless oil. <sup>1</sup>H-NMR (500 MHz, CDCl<sub>3</sub>): δ = 8.12 (br s, 1H), 7.58 (dd, *J* = 8.5, 1.3 Hz, 1H), 7.49-7.42 (m, 3H), 7.40-7.23 (m, 3H), 7.20 (t, *J* = 9.9 Hz, 1H), 7.17 (d, *J* = 3.0 Hz, 1H), 2.37 (s, 3 H). <sup>13</sup>C-NMR (125 MHz, CDCl<sub>3</sub>): δ = 137.0, 136.0, 134.6, 131.0, 130.5, 127.1, 126.9, 125.8, 123.0, 122.3, 120.3, 120.1, 117.6, 111.4, 21.0

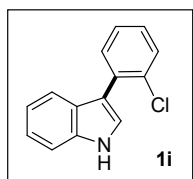

### 3-(2-Chlorophenyl)-1*H*-indole<sup>[7]</sup> (1i)

Light yellow solid, m.p 72-74 °C. <sup>1</sup>H-NMR (500 MHz, CDCl<sub>3</sub>): δ 7.98 (br s, 1H), 7.81 (dt, *J* = 1.0, 3.4 Hz, 1H), 7.69-7.64 (m, 2H), 7.44-7.31 (m, 4H), 7.30-7.24 (m, 2H). <sup>13</sup>C-NMR (125 MHz, CDCl<sub>3</sub>): δ = 136.0, 134.0, 133.4, 132.2, 130.4, 128.0, 127.0, 126.7, 124.6, 122.6, 120.5, 120.3, 114.8, 111.4.

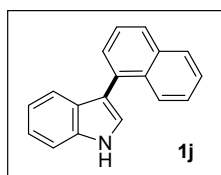

### 3-(Naphthalen-1-yl)-1*H*-indole<sup>[7]</sup> (1j)

Light brown solid, m.p 32-33 °C. <sup>1</sup>H-NMR (500 MHz, CDCl<sub>3</sub>): δ 8.17 (d, *J* = 10.7 Hz, 1H), 8.12 (br s, 1H), 7.99 (dt, *J* = 6.6, 10.0 Hz, 2H), 7.70-7.57 (m, 4H), 7.50-7.46 (m, 2H), 7.37-7.30 (m, 2H), 7.23 (q, *J* = 9.8 Hz, 1H). <sup>13</sup>C-NMR (125 MHz, CDCl<sub>3</sub>): δ = 136.2, 134.2, 133.2, 132.8, 128.5, 128.0, 127.9, 127.4, 126.8, 126.0, 125.9, 123.8, 122.6, 120.5, 120.3, 116.6, 111.5.

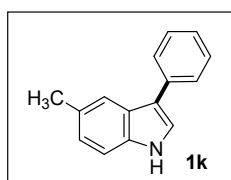

### 5-Methyl-3-phenyl-1*H*-indole<sup>[8]</sup> (1k)

White solid, m.p. 106-108 °C. <sup>1</sup>H-NMR (400 MHz, CDCl<sub>3</sub>): δ = 7.98 (br s, 1H), 7.72 (s, 1H), 7.68 (d, *J* = 7.4 Hz, 2H), 7.44-7.41 (t, 2H), 7.29-7.18 (m, 3H), 7.05 (d, *J* = 8.0 Hz, 1H), 2.46 (s, 3H). <sup>13</sup>C-NMR (100 MHz, CDCl<sub>3</sub>): δ = 135.8, 135.1, 129.6, 128.8, 127.5, 126.0, 125.9, 124.0, 122.0, 119.4, 117.9, 111.1, 21.6.

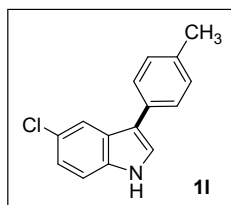

### 3-(4-Methylphenyl)-5-chloro-1*H*-indole (1l)

White solid, m.p. 99-100 °C. <sup>1</sup>H-NMR (400 MHz, CDCl<sub>3</sub>): δ = 8.12 (br s, 1H), 7.86 (d, *J* = 2.0 Hz, 1H), 7.48 (d, *J* = 8.1 Hz, 2H), 7.27-7.24 (m, 4H), 7.16 (dd, *J* = 2.0, 2.0 Hz, 1H), 2.39 (s, 3H). <sup>13</sup>C-NMR (100 MHz, CDCl<sub>3</sub>): δ = 136.0, 135.0, 132.0, 129.6, 127.3, 127.0, 126.8, 125.9, 122.7, 122.6, 119.3, 119.2, 118.0, 112.3, 21.2. HRMS (EI) [M<sup>+</sup>]/*z* calcd. 241.72, found 241.00.

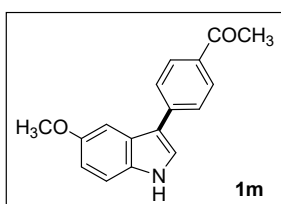

### 3-(4-Acetylphenyl)-5-methoxy-1*H*-indole (1m)

White solid, m.p. 118-119 °C. <sup>1</sup>H-NMR (400 MHz, CDCl<sub>3</sub>): δ = 8.45 (br s, 1H), 7.97 (d, *J* = 8.0 Hz, 2H), 7.65 (t, 2H), 7.35 (d, *J* = 10.5 Hz, 2H), 7.26 (d, *J* = 8.8 Hz, 1H), 6.87 (d, *J* = 8.7 Hz, 1H), 3.81 (s, 3H), 2.56 (s, 3H). <sup>13</sup>C-NMR (100 MHz, CDCl<sub>3</sub>): δ = 155.1, 141.1, 134.4, 132.0, 129.1, 129.0, 127.4, 126.8, 125.9, 123.8, 112.9, 112.4, 101.8, 56.0, 26.5. HRMS (EI) [M<sup>+</sup>]/*z* calcd. 265.31, found 265.00.

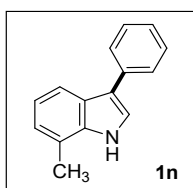

### 7-Methyl-3-phenyl-1*H*-indole<sup>[7]</sup> (1n)

Light yellow solid, m.p 109-111 °C. <sup>1</sup>H-NMR (500 MHz, CDCl<sub>3</sub>): δ = 7.99 (br s, 1H), 7.96 (d, *J* = 6.6 Hz, 1H), 7.79 (d, *J* = 6.1 Hz, 2H), 7.57 (t, *J* = 12.8 Hz, 2H), 7.42 (t, *J* = 12.3 Hz, 1H), 7.30 (d, *J* = 2.1 Hz, 1H), 7.26 (t, *J* = 12.6 Hz, 1H), 7.17 (d, *J* = 5.9 Hz, 1H), 2.54 (s, 3H). <sup>13</sup>C-NMR (125 MHz, CDCl<sub>3</sub>): δ = 136.4, 136.0, 129.0, 127.7, 126.2, 125.5, 123.1, 121.9, 120.8, 120.7, 118.8, 117.8, 16.7.

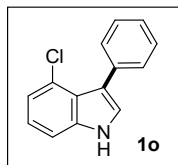

### 3-Phenyl-4-chloro-1H-indole (1o)

Colorless oil.  $^1\text{H-NMR}$  (500 MHz,  $\text{CDCl}_3$ ):  $\delta = 8.14$  (br s, 1H), 7.79 (dt,  $J = 2.0, 5.5$  Hz, 2H), 7.66-7.56 (m, 3H), 7.40-7.20 (m, 3H), 7.16 (d,  $J = 2.9$  Hz, 1H).  $^{13}\text{C-NMR}$  (125 MHz,  $\text{CDCl}_3$ ):  $\delta = 137.8, 135.6, 131.4, 127.9, 127.0, 126.6, 125.1, 123.4, 123.1, 121.7, 119.0, 110.7$ .

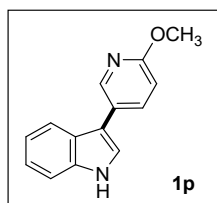

### 3-(6-Methoxypyridin-3-yl)-1H-indole<sup>[10]</sup> (1p)

Yellow solid, m.p. 97-98 °C.  $^1\text{H-NMR}$  (500 MHz,  $\text{CDCl}_3$ ):  $\delta = 8.63$  (br s, 1H), 8.48 (d,  $J = 2.1$  Hz, 1H), 7.82 (dd,  $J = 3.0, 2.9$  Hz, 1H), 7.64 (d,  $J = 9.7$  Hz, 1H), 7.35 (d,  $J = 9.9$  Hz, 1H), 7.26-7.13 (m, 2H), 6.81 (d,  $J = 10.8$  Hz, 1H), 6.74 (s, 1H), 3.97 (s, 3H).  $^{13}\text{C-NMR}$  (125 MHz,  $\text{CDCl}_3$ ):  $\delta = 163.7, 143.2, 137.0, 136.1, 135.1, 129.2, 122.5, 122.3, 120.6, 120.5, 111.4, 111.0, 99.8, 55.9$ .

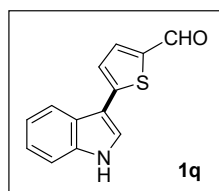

### 5-(1H-Indol-3-yl)thiophene-2-carbaldehyde (1q)

Yellow oil.  $^1\text{H-NMR}$  (500 MHz,  $\text{CDCl}_3$ ):  $\delta = 7.99$  (br s, 1H), 7.47 (d,  $J = 9.9$  Hz, 1H), 7.35 (t,  $J = 11.1$  Hz, 1H), 7.21-7.17 (t, 1H), 7.08-7.04 (t, 1H), 6.86 (t,  $J = 4.6$  Hz, 1H), 6.81 (d,  $J = 2.8$  Hz, 1H), 6.64 (t,  $J = 5.8$  Hz, 1H), 6.06 (s, 1H).  $^{13}\text{C-NMR}$  (125 MHz,  $\text{CDCl}_3$ ):  $\delta = 150.5, 136.7, 129.4, 126.7, 125.5, 123.4, 122.2, 119.7, 119.6, 118.9, 111.4, 110.0$ .

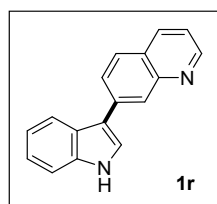

### 7-(1H-Indol-3-yl)quinoline (1r)

Brown solid, m.p. 238-240 °C.  $^1\text{H-NMR}$  (500 MHz,  $\text{CDCl}_3$ ):  $\delta = 8.33$  (br s, 1H), 7.87 (s, 1H), 7.68-7.56 (m, 5H), 7.41 (t,  $J = 9.9$  Hz, 1H), 7.21-7.15 (m, 2H), 7.52-7.50 (dt,  $J = 2.9, 1.2$  Hz, 2H).  $^{13}\text{C-NMR}$  (125 MHz,  $\text{CDCl}_3$ ):  $\delta = 154.8, 146.0, 138.6, 136.9, 129.5, 128.2, 127.8, 122.4, 122.2, 120.6, 120.4, 117.9, 112.1, 110.9, 106.8, 99.7$

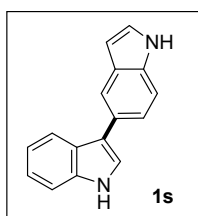

### 1H,1'H-3,5'-biindole (1s)

Pale-brown solid, m.p. 193-195 °C.  $^1\text{H-NMR}$  (400 MHz,  $\text{CDCl}_3$ ):  $\delta = 8.14$  (br s, 2H), 7.99 (dd,  $J = 1.1, 1.1$  Hz, 1H), 7.92 (d,  $J = 1.5$  Hz, 1H), 7.51 (dd,  $J = 1.6, 1.9$  Hz, 1H), 7.45-7.40 (m, 2H), 7.32 (d,  $J = 2.5$  Hz, 1H), 7.22 (t,  $J = 3.2$  Hz, 2H), 7.17 (t,  $J = 7.9$  Hz, 1H), 6.59 (s, 1 Hz).  $^{13}\text{C-NMR}$  (100 MHz,  $\text{CDCl}_3$ ):  $\delta = 136.6, 135.0, 128.4, 127.2, 126.2, 124.6, 122.7, 122.2, 121.3, 120.0, 119.4, 117.3, 111.3, 111.2, 102.7, 98.7$ .

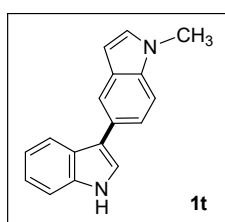

### 1'-Methyl-1H,1'H-3,5'-biindole<sup>[9]</sup> (1t)

Pale-brown solid, m.p. 163-164 °C.  $^1\text{H-NMR}$  (400 MHz,  $\text{CDCl}_3$ ):  $\delta = 8.64$  (br s, 1H), 8.03 (d,  $J = 8.0$  Hz, 3H), 7.74-7.72 (m, 3H), 7.41 (d,  $J = 9.9$  Hz, 2H), 7.33 (d,  $J = 8.8$  Hz, 1H), 6.93 (d,  $J = 8.6$  Hz, 1H), 3.88 (s, 3H).  $^{13}\text{C-NMR}$  (100 MHz,  $\text{CDCl}_3$ ):  $\delta = 155.0, 141.1, 136.5, 134.2, 132.0, 129.1, 129.0, 127.4, 126.7, 125.7, 124.7, 123.9, 116.8, 112.8, 112.5, 101.6, 56.0$ .

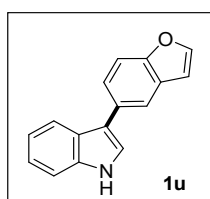

### 3-(Benzofuran-5-yl)-1H-indole<sup>[10]</sup> (1u)

Light yellow oil.  $^1\text{H-NMR}$  (400 MHz,  $\text{CDCl}_3$ ):  $\delta = 8.81$  (br s, 1H), 8.16 (d,  $J = 8.6$  Hz, 2H), 8.06 (t,  $J = 11.0$  Hz, 2H), 7.68 (d,  $J = 7.8$  Hz, 1H), 7.44-7.41 (m, 2H), 7.22-7.21 (m, 1H), 7.15 (dd,  $J = 1.0, 7.0$  Hz, 1H), 6.99 (d,  $J = 2.2$  Hz, 1H).  $^{13}\text{C-NMR}$  (100 MHz,  $\text{CDCl}_3$ ):  $\delta = 150.4, 136.1, 130.7, 130.3, 129.3, 128.7, 127.6, 124.9, 123.0, 122.7, 121.9, 120.6, 119.8, 112.0, 111.1, 101.5$ .

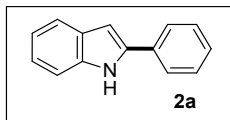

### 2-Phenyl-1*H*-indole<sup>[11]</sup> (2a)

White solid, m.p. 188-190 °C. <sup>1</sup>H-NMR (400 MHz, CDCl<sub>3</sub>): δ = 8.32 (br s, 1H), 7.67 (d, *J* = 7.0 Hz, 3H), 7.48-7.40 (m, 3H), 7.37-7.33 (t, 1H), 7.26-7.21 (m, 1H), 7.17 (d, *J* = 8.0 Hz, 1H), 6.86 (s, 1H). <sup>13</sup>C-NMR (100 MHz, CDCl<sub>3</sub>): δ = 136.9, 132.4, 129.3, 129.0, 127.7, 125.2, 122.4, 120.7, 120.3, 111.0, 100.4.

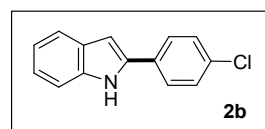

### 2-(4-Chlorophenyl)-1*H*-indole<sup>[12]</sup> (2b)

Off white solid, m.p. 201-203 °C. <sup>1</sup>H-NMR (400 MHz, CDCl<sub>3</sub>): δ = 8.30 (br s, 1H), 7.62 (dd, *J* = 1.0, 1.1 Hz, 1H), 7.55 (dd, *J* = 2.0, 2.0 Hz, 2H), 7.40-7.37 (m, 3H), 7.22-7.18 (m, 1H), 7.14-7.11 (m, 1H), 6.80 (dd, *J* = 0.9, 0.8 Hz, 1H). <sup>13</sup>C-NMR (100 MHz, CDCl<sub>3</sub>): δ = 137.0, 136.7, 133.4, 130.8, 129.2, 129.1, 128.8, 126.3, 122.6, 122.0, 120.7, 120.4, 111.0, 100.4.

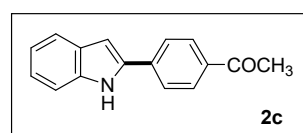

### 2-(4-Acetylphenyl)-1*H*-indole (2c)

White solid, m.p. 172-174 °C. <sup>1</sup>H-NMR (500 MHz, CDCl<sub>3</sub>): δ = 8.11 (br s, 1H), 7.97 (d, *J* = 6.6 Hz, 1H), 7.64 (dt, *J* = 5.8, 2.5 Hz, 2H), 7.39 (d, *J* = 6.7 Hz, 1H), 7.29 (t, *J* = 12.1 Hz, 1H), 7.25 (t, *J* = 10.0 Hz, 2H), 7.06 ((dd, *J* = 1.5, 2.4 Hz, 2H), 3.90 (s, 3H). <sup>13</sup>C-NMR (125 MHz, CDCl<sub>3</sub>): δ = 158.2, 136.8, 128.8, 128.3, 126.0, 122.4, 121.4, 120.3, 119.9, 118.0, 114.5, 111.6, 55.5.

### 2-(4-Nitrophenyl)-1*H*-indole<sup>[13]</sup> (2d)

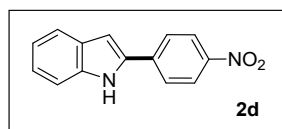

Yellow solid, m.p. > 230 °C. <sup>1</sup>H-NMR (400 MHz, DMSO-d<sub>6</sub>): δ = 11.85 (br s, 1H), 8.31 (d, *J* = 9.0 Hz, 2H), 8.11 (d, *J* = 8.9 Hz, 2H), 7.60 (d, *J* = 7.9 Hz, 1H), 7.45 (d, *J* = 8.1 Hz, 1H), 7.21-7.16 (m, 2H), 7.07-7.03 (t, 1H). <sup>13</sup>C-NMR (100 MHz, DMSO-d<sub>6</sub>): δ = 146.3, 139.0, 138.4, 135.7, 128.9, 125.9, 124.8, 123.6, 121.3, 120.4, 112.2,

102.9.

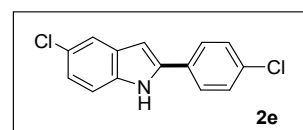

### 2-(4-Chlorophenyl)-5-chloro-1*H*-indole (2e)

Off white solid, m.p. 187-189 °C. <sup>1</sup>H-NMR (400 MHz, CDCl<sub>3</sub>): δ = 8.32 (br s, 1H), 7.61 (dd, *J* = 11.5, 5.6 Hz, 2H), 7.42 (d, *J* = 5.5 Hz, 2H), 7.31 (d, *J* = 2.1 Hz, 2H), 7.23 (d, *J* = 1.5 Hz, 1H), 7.15 (d, *J* = 5.7 Hz, 1H). <sup>13</sup>C-NMR (100 MHz, CDCl<sub>3</sub>): δ = 138.2, 135.3, 134.0, 130.5, 130.3, 129.4, 126.5, 126.1, 123.0, 122.4, 120.2, 120.1, 112.0, 100.1.

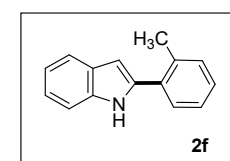

### 2-(2-Methylphenyl)-1*H*-indole<sup>[12]</sup> (2f)

White solid, m.p. 92-93 °C. <sup>1</sup>H-NMR (500 MHz, CDCl<sub>3</sub>): δ = 8.24 (1H, br), 7.73 (t, *J* = 10.6 Hz, 2H), 7.54 (d, *J* = 9.7 Hz, 1H), 7.50-7.46 (t, 2H), 7.38-7.35 (t, 1H), 7.11 (t, *J* = 9.1 Hz, 1H), 7.09-7.04 (t, 1H), 6.88 (s, 1H), 2.58 (s, 3H). <sup>13</sup>C-NMR (125 MHz, CDCl<sub>3</sub>): δ = 136.6, 132.7, 130.3, 129.1, 129.0, 128.8, 128.6, 128.4, 127.8, 125.4, 123.1, 120.6, 118.6, 16.9.

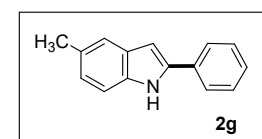

### 5-Methyl-2-phenyl-1*H*-indole<sup>[11]</sup> (2g)

Colorless solid, m.p. 214-215 °C. <sup>1</sup>H-NMR (400 MHz, CDCl<sub>3</sub>): δ = 8.25 (br s, 1H), 7.65 (dd, *J* = 1.4, 1.1 Hz, 2H), 7.46-7.41 (m, 3H), 7.33-7.28 (m, 2H), 7.02 (dd, *J* = 1.6, 1.6 Hz, 1H), 6.75 (dd, *J* = 2.1, 0.9 Hz, 1H), 2.45 (s, 3H). <sup>13</sup>C-NMR (100 MHz, CDCl<sub>3</sub>): δ = 136.9, 136.7, 133.4, 130.8, 129.2, 129.1, 128.9, 126.3, 122.6, 122.0, 120.7, 120.4, 111.0, 100.4, 30.5.

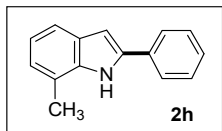

### 7-Methyl-2-phenyl-1H-indole<sup>[11]</sup> (2h)

Colorless solid, m.p. 116-117 °C. <sup>1</sup>H-NMR (500 MHz, CDCl<sub>3</sub>): δ = 8.24 (br s, 1H), 7.75 (d, *J* = 6.6 Hz, 2H), 7.58 (d, *J* = 6.6 Hz, 1H), 7.51 (t, *J* = 12.8 Hz, 2H), 7.39 (t, *J* = 12.3 Hz, 1H), 7.15 (t, *J* = 12.4 Hz, 1H), 7.09 (d, *J* = 5.9 Hz, 1H), 6.9 (d, *J* = 1.7 Hz, 1H), 2.60 (s, 3H). <sup>13</sup>C-NMR (125 MHz, CDCl<sub>3</sub>): δ = 137.8, 136.6, 132.7, 129.2, 129.0, 127.8, 125.4, 123.1, 120.7, 120.3, 118.6, 100.8, 16.9.

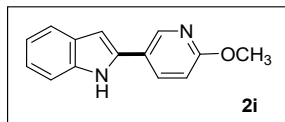

### 2-(6-Methoxypyridin-3-yl)-1H-indole (2i)

White solid, m.p. 122-124 °C. <sup>1</sup>H NMR (500 MHz, CDCl<sub>3</sub>): δ = 8.69 (br s, 1H), 8.52 (s, 1H), 7.90-7.87 (m, 2H), 7.41 (d, *J* = 10.1 Hz, 1H), 7.29-7.20 (m, 3H), 6.88 (t, *J* = 13.2 Hz, 1H), 4.04 (s, 3H). <sup>13</sup>C NMR (125 MHz, CDCl<sub>3</sub>): δ = 162.8, 145.0, 138.3, 136.8, 125.8, 125.0, 122.7, 121.7, 120.5, 119.4, 114.6, 111.7, 110.9, 53.7.

## 2 Reference

- [1] Y. Jia, J. Zhu, *J. Org. Chem.* **2006**, *71*, 7826.
- [2] Z. Zhang, Z. Hu, Z. Yu, P. Lei, H. Chi, Y. Wang, R. He, *Tetrahedron Lett.* **2007**, *48*, 2415.
- [3] L. Ackermann, M. Dell'Acqua, S. Fenner, R. Vicente, R. Sandmann, *Org. Lett.* **2011**, *13*, 2358.
- [4] L. Ackermann, S. Barfuesser, *Synlett.* **2009**, 808.
- [5] L. Joucla, N. Batail, L. Djakovitch, *Adv. Synth. Catal.* **2010**, *352*, 2929.
- [6] R. Pathak, J. M. Nhlapo, S. Govender, J. P. Michael, W. A. L. Van Otterlo, C. B. De Koning, *Tetrahedron* **2006**, *62*, 2820.
- [7] Y. Chen, S. Guo, K. Li, J. Qu, H. Yuan, Q. Hua, B. Chen, *Adv. Synth. Catal.* **2013**, *355*, 711.
- [8] J. Zhang, Z. Yin, P. Leonard, J. Wu, K. Sioson, C. Liu, R. Lapo, S. Zheng, *Angew. Chem. Int. Ed.* **2013**, *52*, 1753.
- [9] M. Yamaguchi, K. Suzuki, Y. Sato, K. Manabe, *Org. Lett.* **2017**, *19*, 5388.
- [10] J. Chen, J. Wu, *Angew. Chem.* **2017**, *129*, 4009.
- [11] O. Moncea, D. Poinso, A. A. Fokin, P. R. Schreiner, J.-C. Hierso, *ChemCatChem.* **2018**, *10*, 2915.
- [12] Y. Gao, W. Zhu, L. Yin, B. Dong, J. Fu, Z. Ye, F. Xue, C. Jiang, *Tetrahedron Lett.* **2017**, *58*, 2213.
- [13] Y.-Q. Fang, M. Lautens, *J. Org. Chem.*, **2008**, *73*, 538.



### 3 NMR Spectra

8.0477  
7.9486  
7.9294  
7.6645  
7.6463  
7.4474  
7.4289  
7.4101  
7.3591  
7.3403  
7.2907  
7.2716  
7.2632  
7.2570  
7.2307  
7.2110  
7.1990  
7.1803  
7.1622

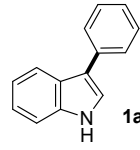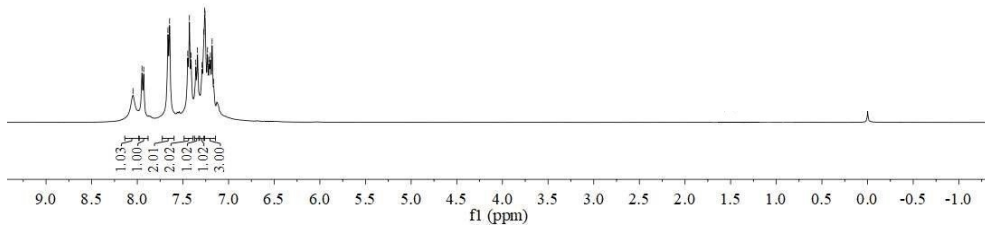

136.80  
135.74  
128.97  
127.61  
126.15  
125.83  
122.52  
122.06  
120.48  
119.03  
118.26  
111.64  
77.54  
77.22  
76.90

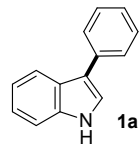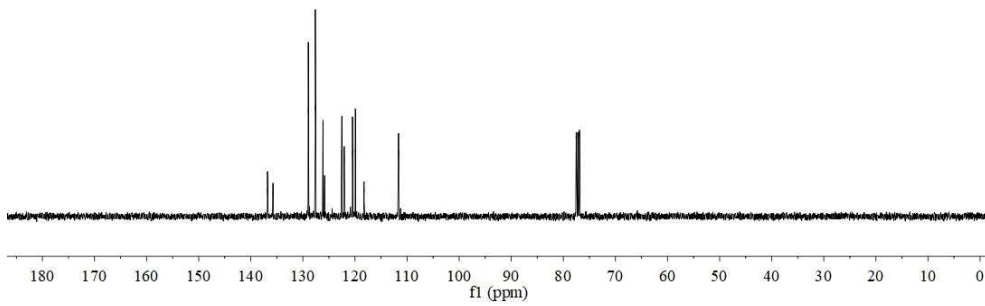

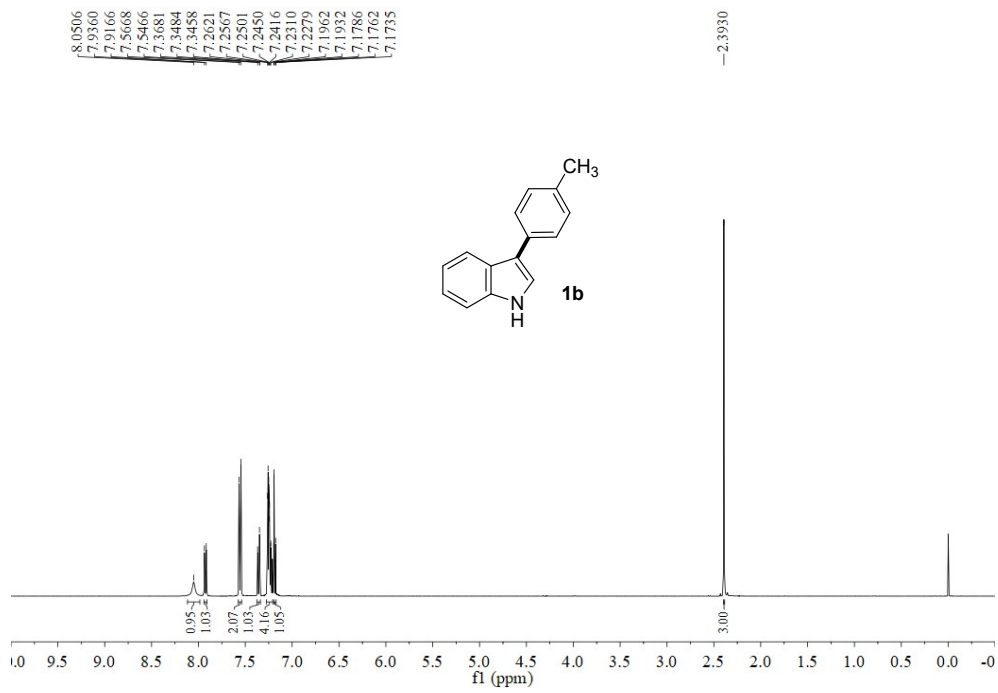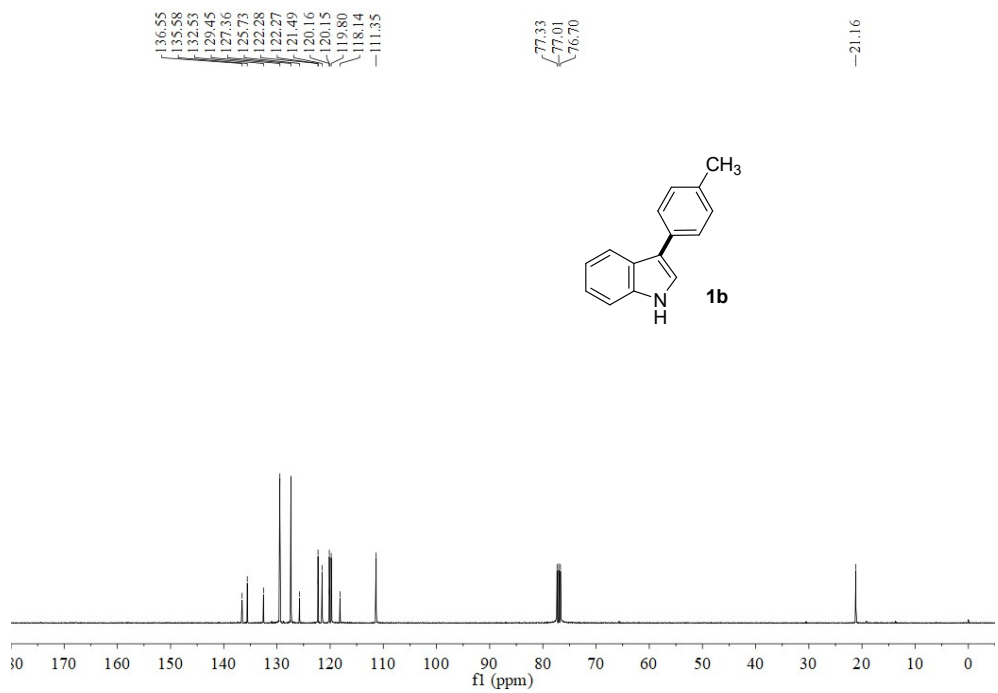

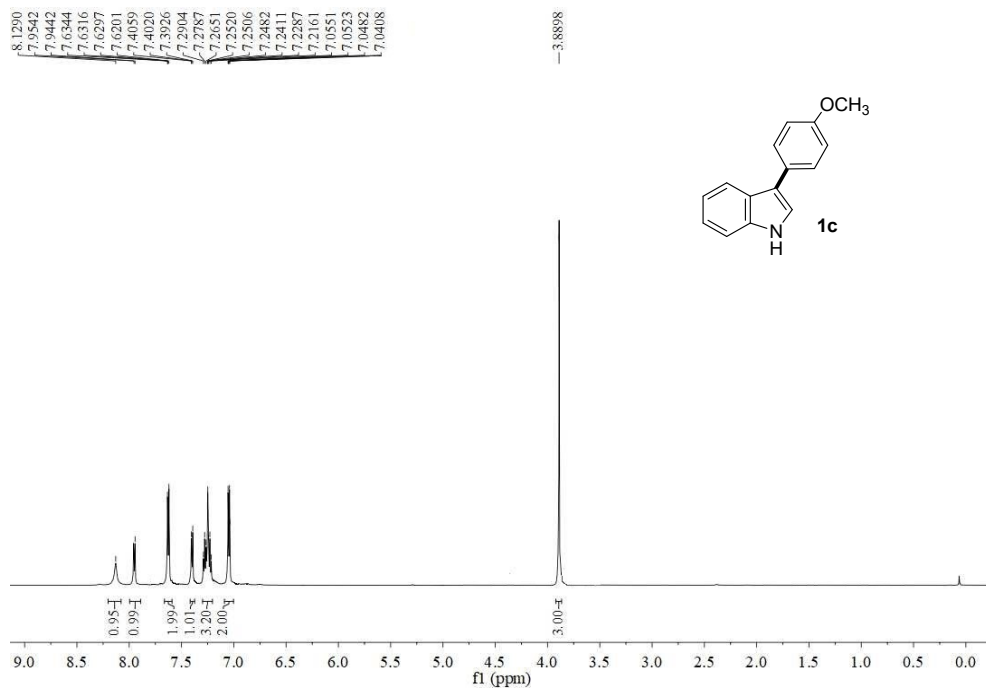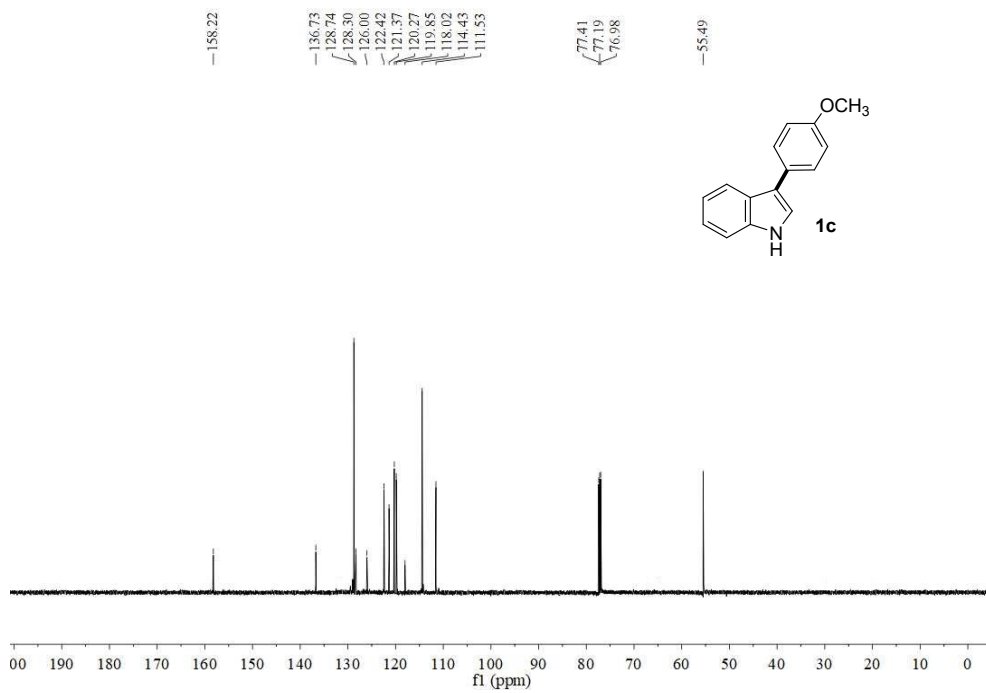

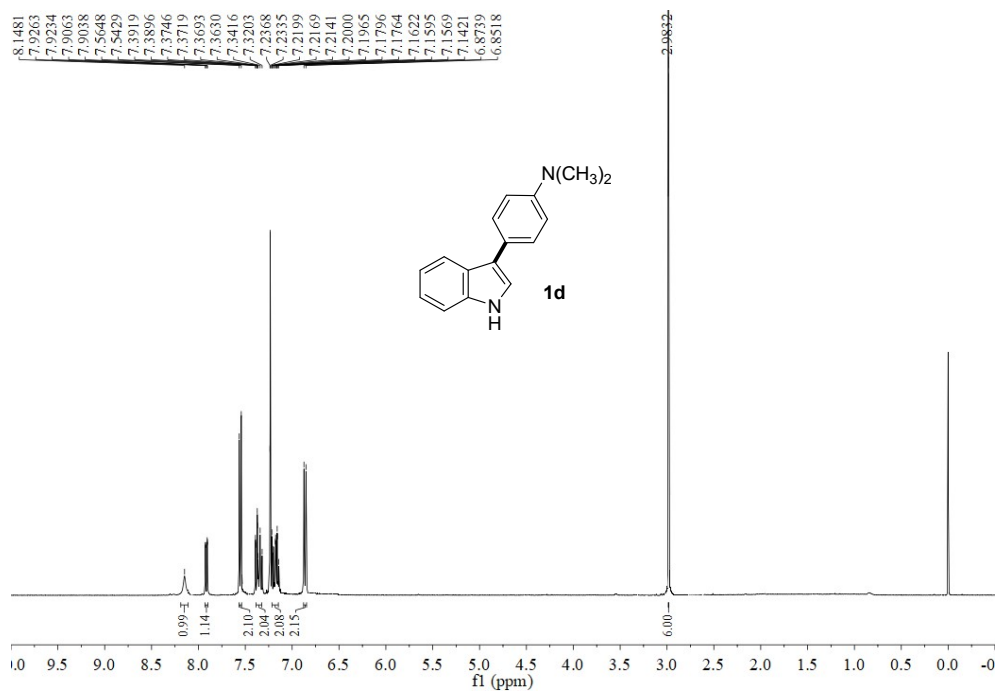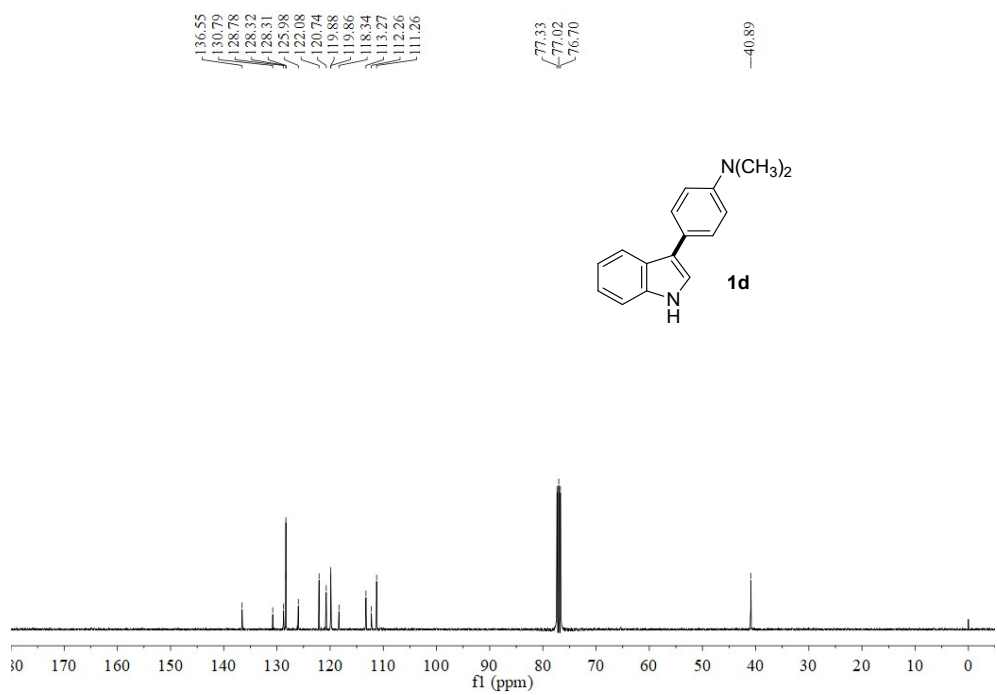

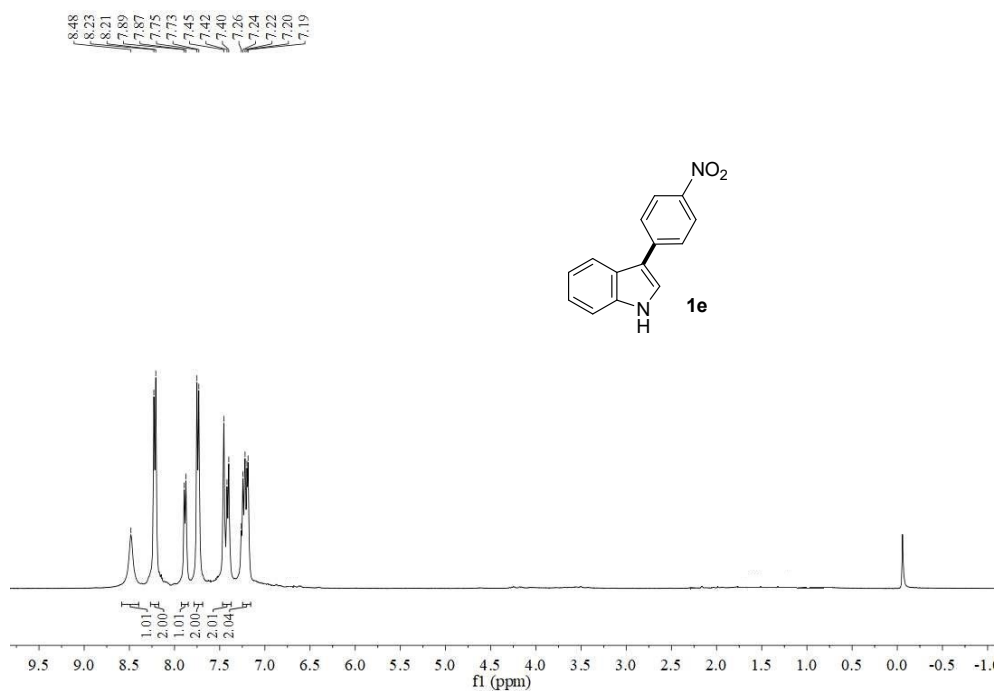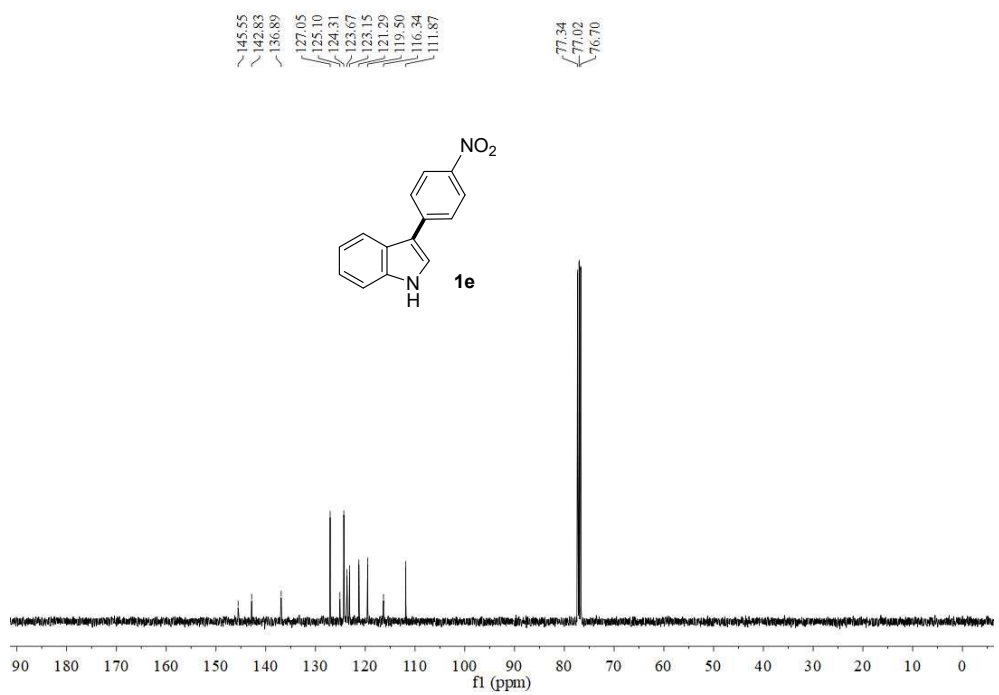

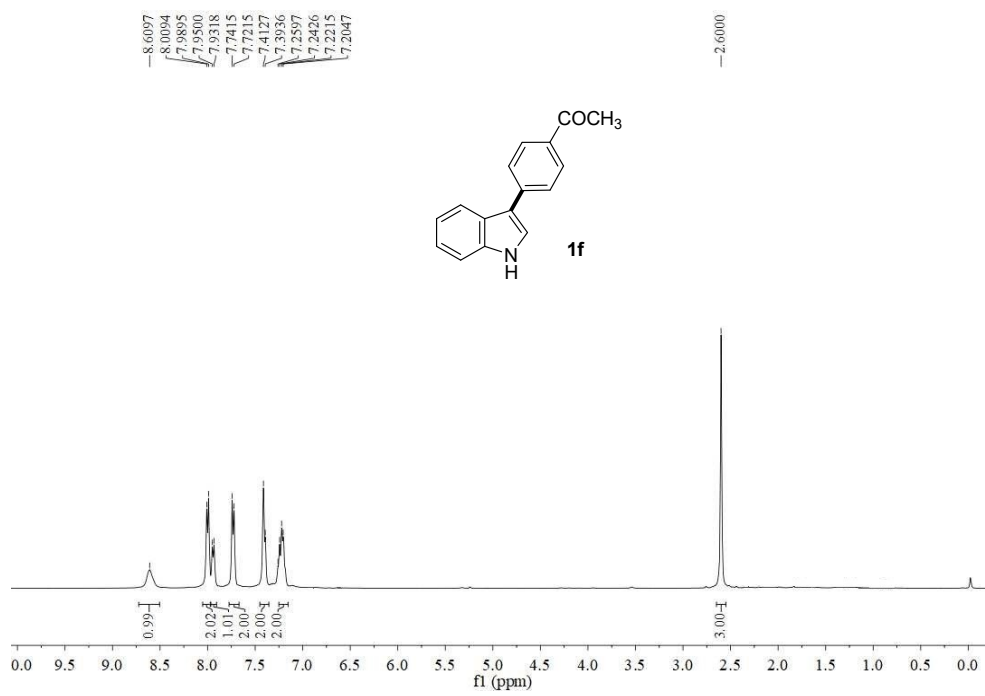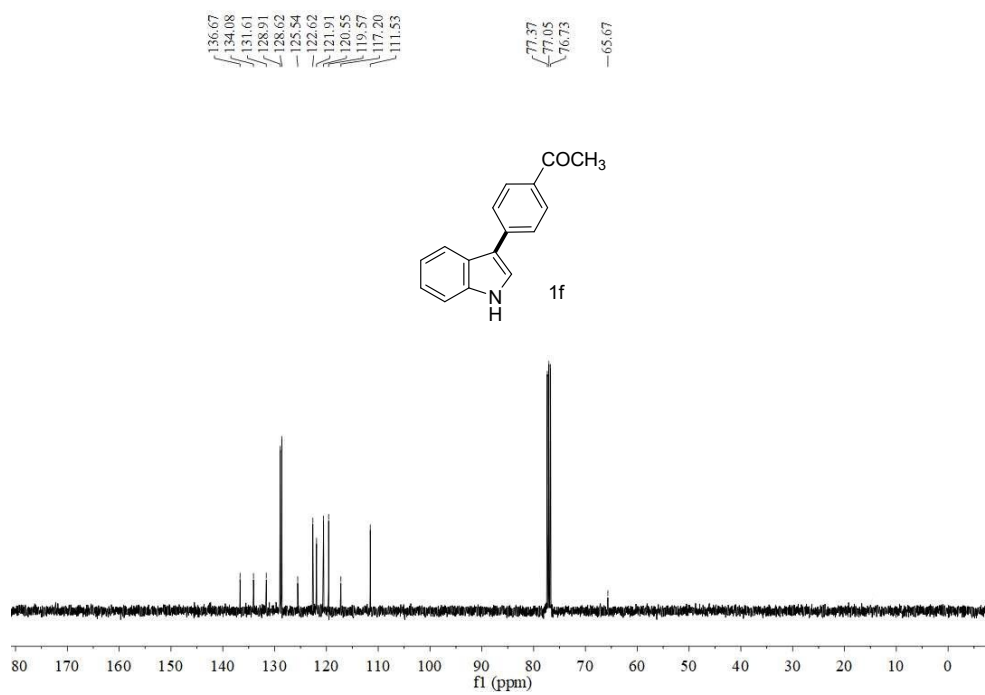

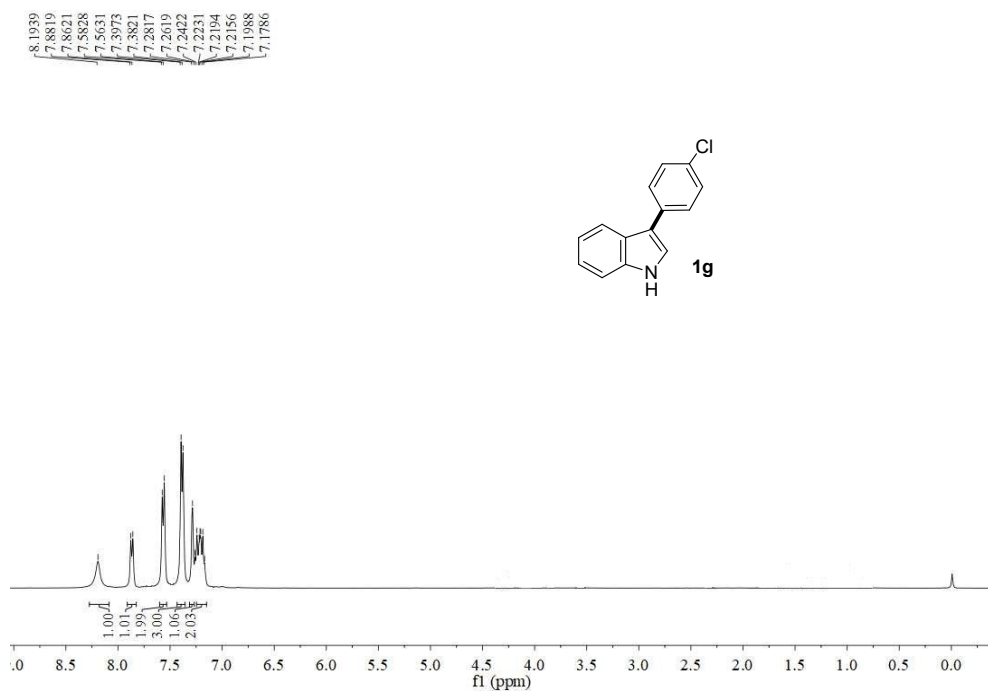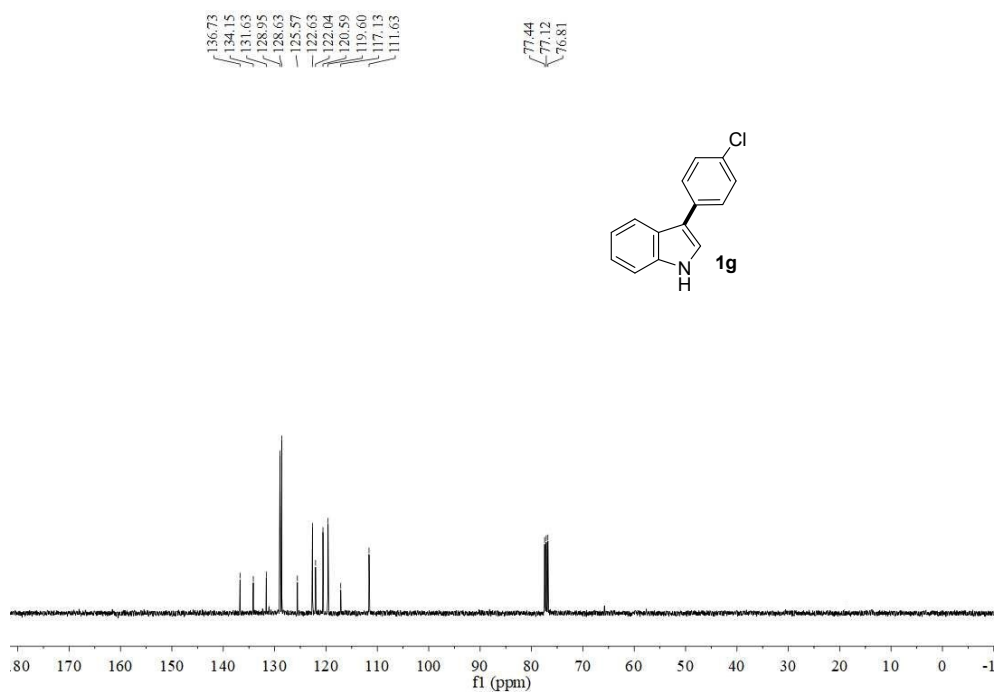

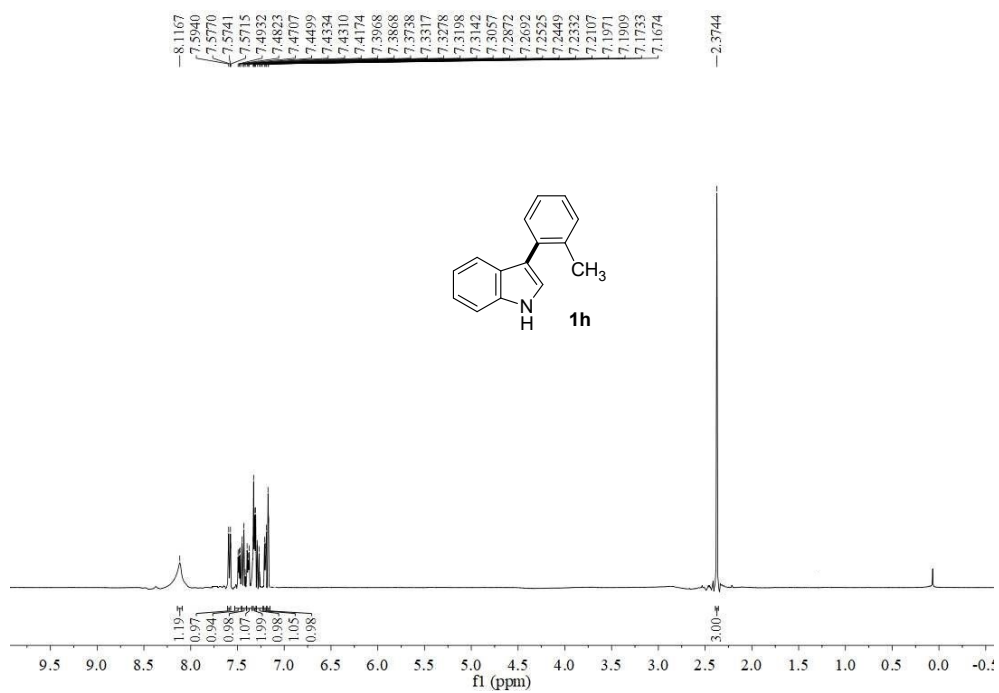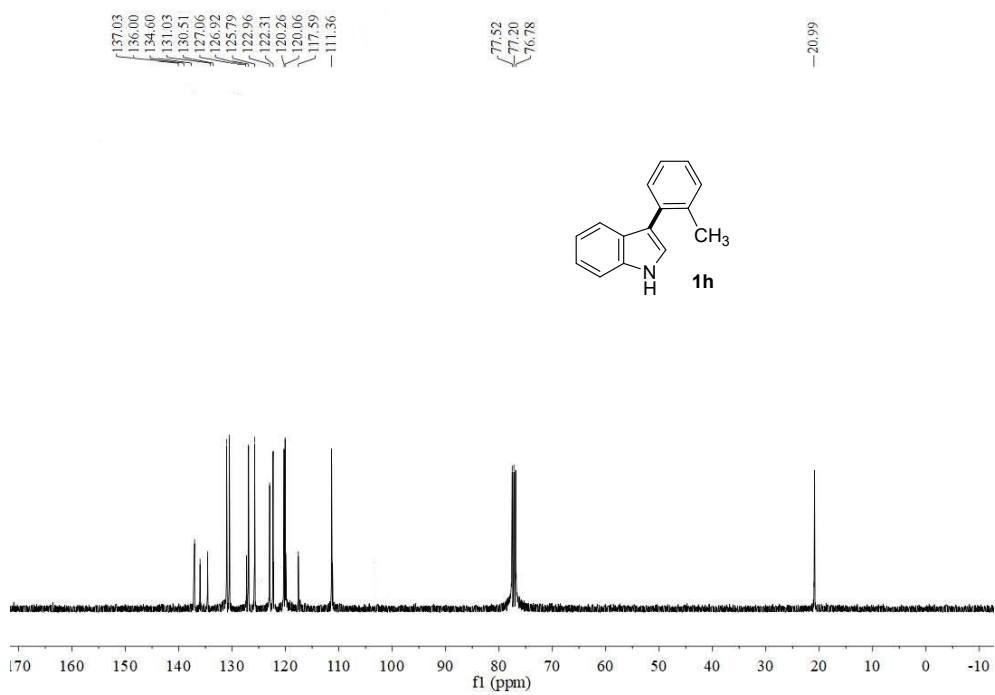



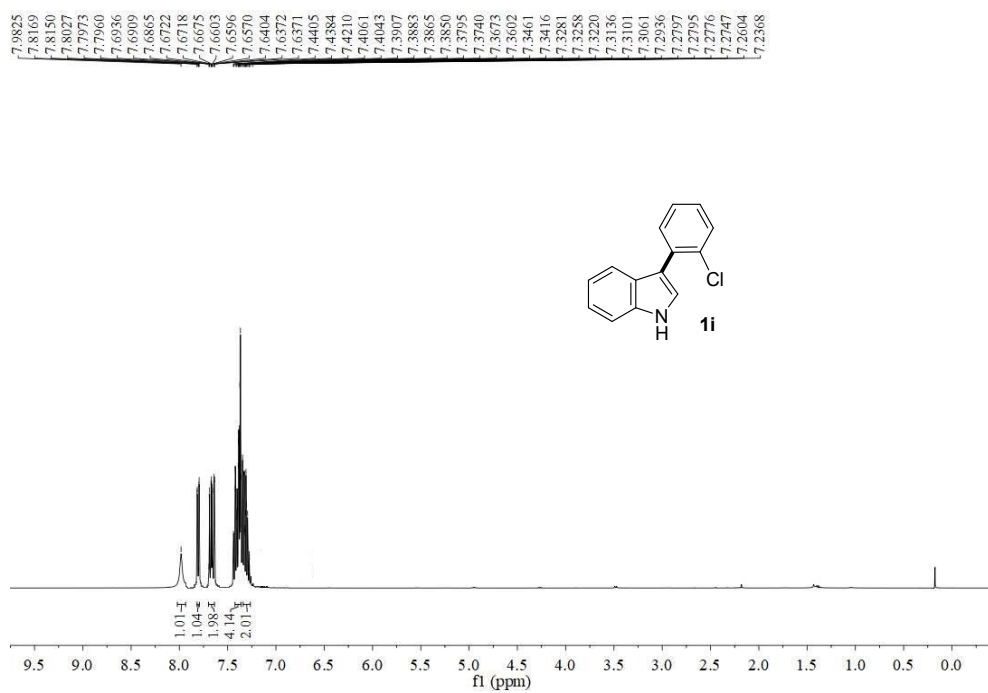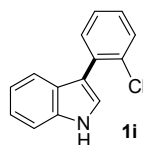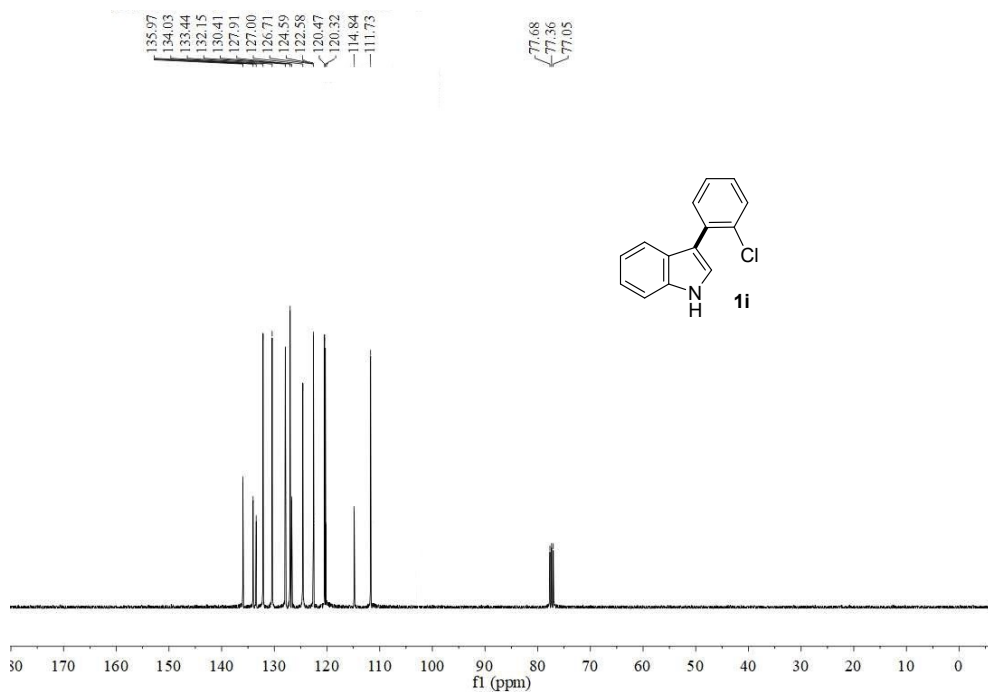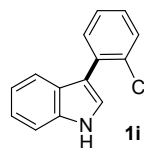

8.1813  
8.1692  
8.1600  
8.1192  
8.0269  
8.0137  
7.9676  
7.9530  
7.9476  
7.6992  
7.6886  
7.6818  
7.6527  
7.6339  
7.6229  
7.6228  
7.6035  
7.6034  
7.5871  
7.5864  
7.5672  
7.5672  
7.4967  
7.4966  
7.4796  
7.4702  
7.4598  
7.3762  
7.3583  
7.3578  
7.3383  
7.3080  
7.3059  
7.3027  
7.2432  
7.2431  
7.2242  
7.2237

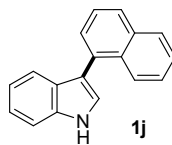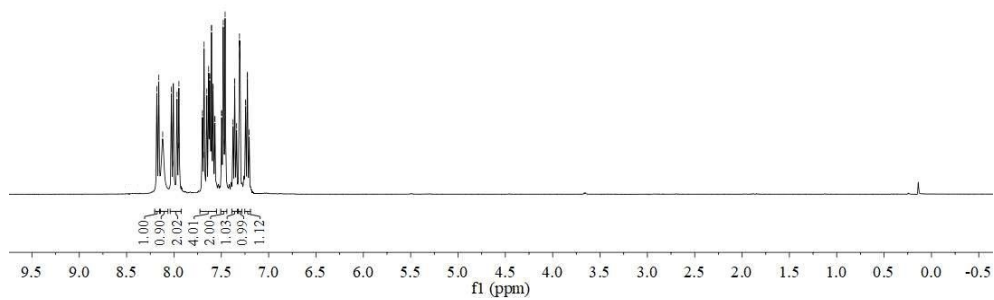

136.22  
134.21  
133.17  
132.76  
128.51  
127.96  
127.85  
127.39  
126.78  
125.98  
125.86  
123.82  
122.88  
120.51  
120.26  
116.62  
111.54  
77.60  
77.29  
76.97

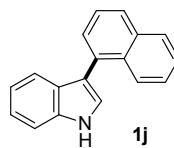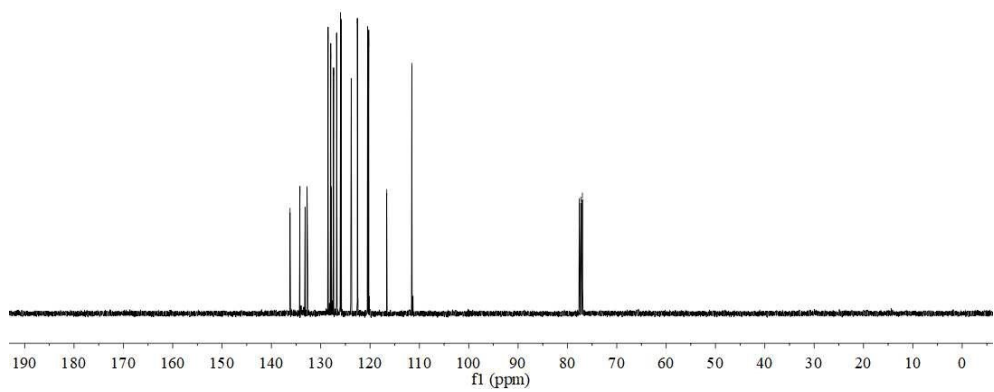

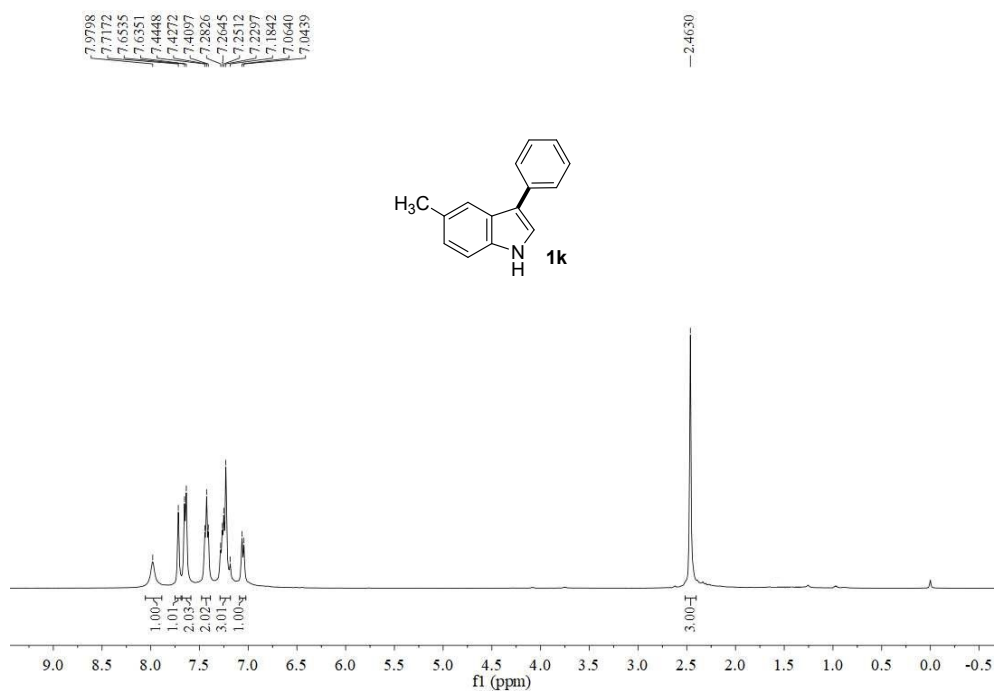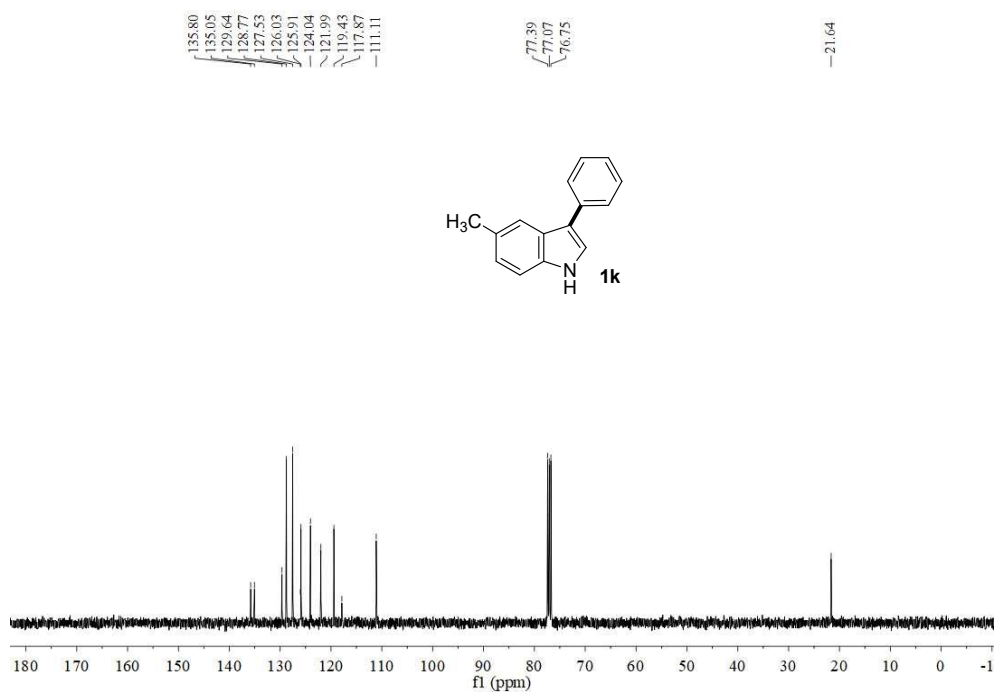

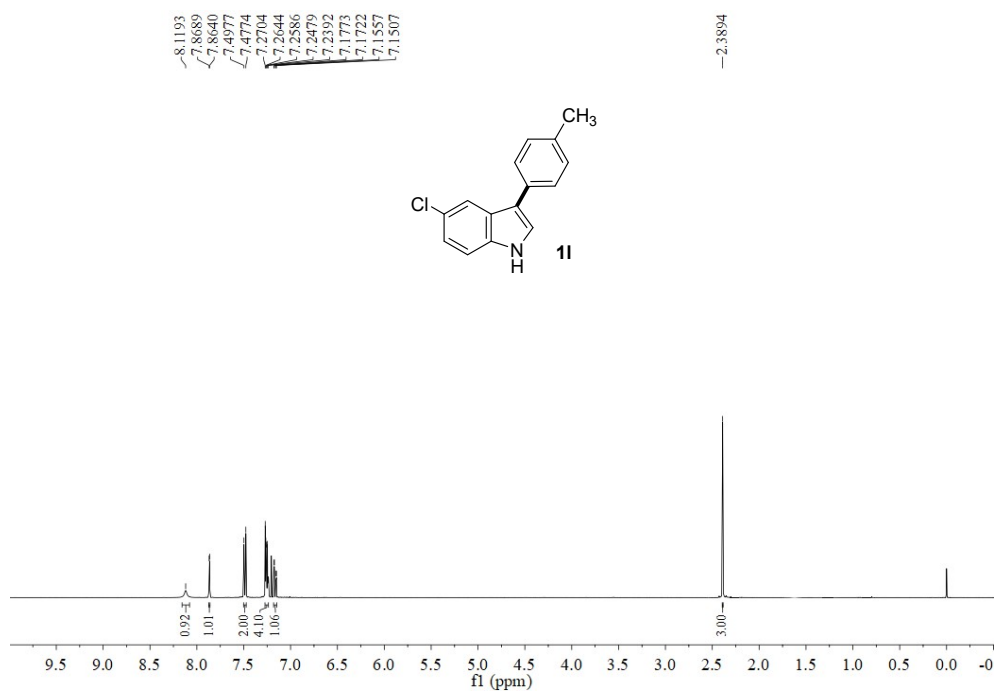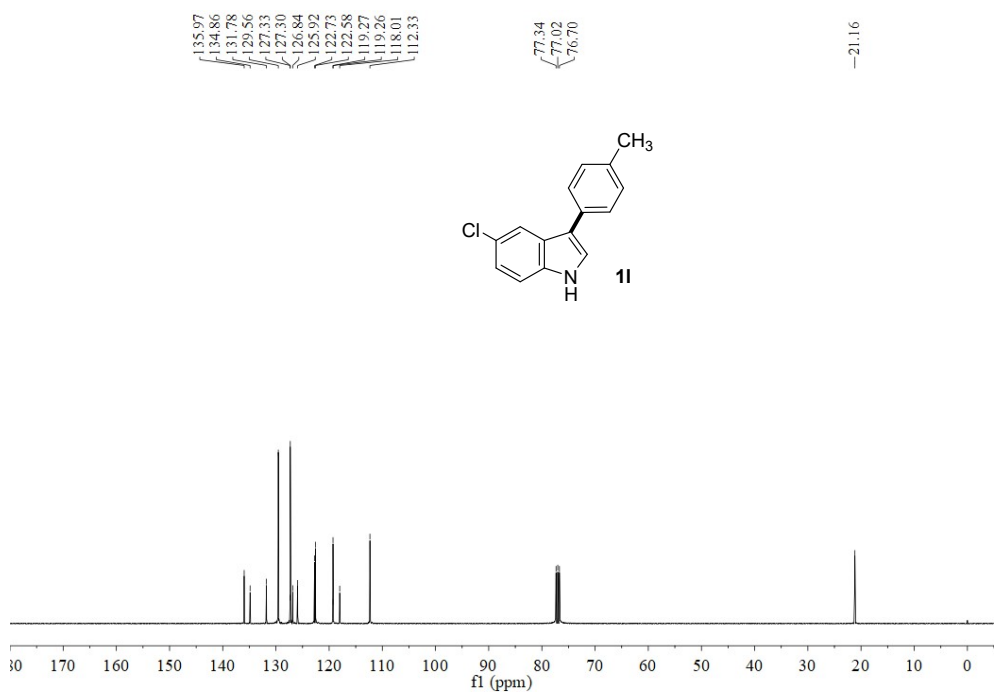

x10<sup>7</sup> -EI 扫描 (rt: 13.148 min) 2021082701.D 扣除

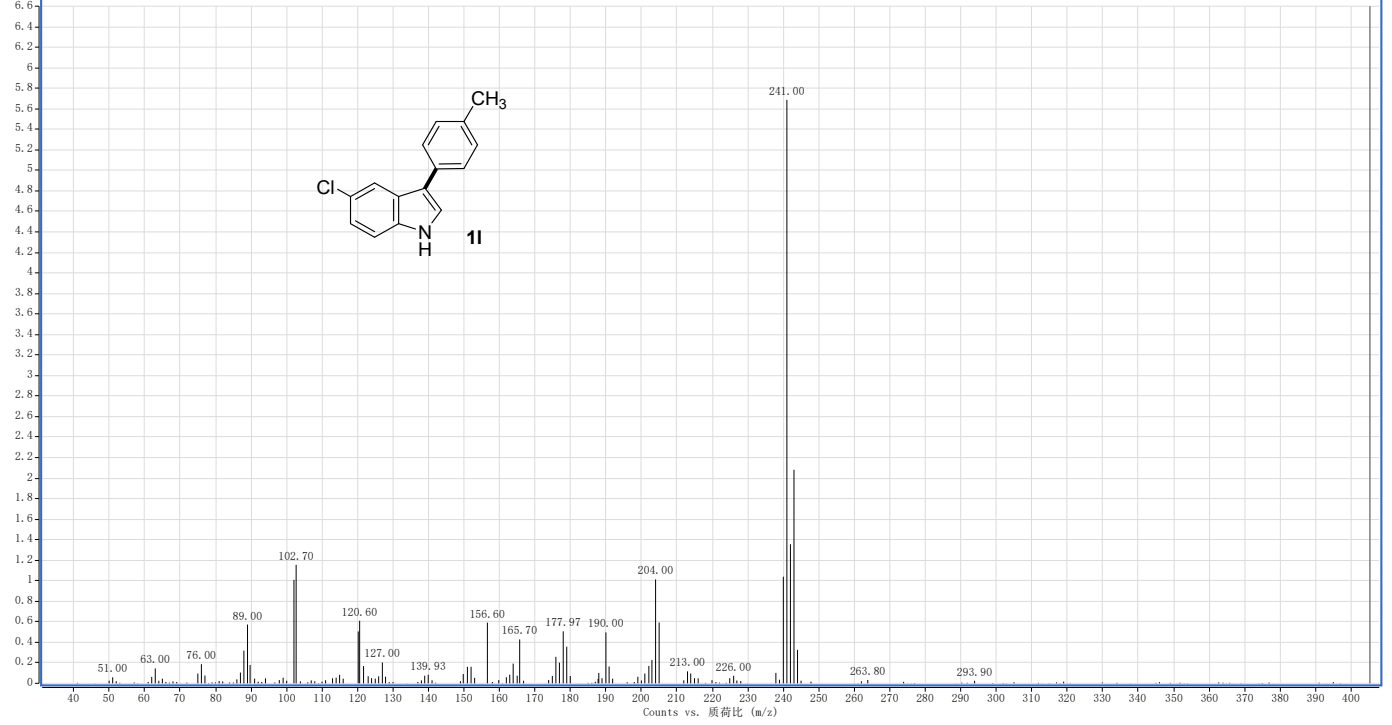

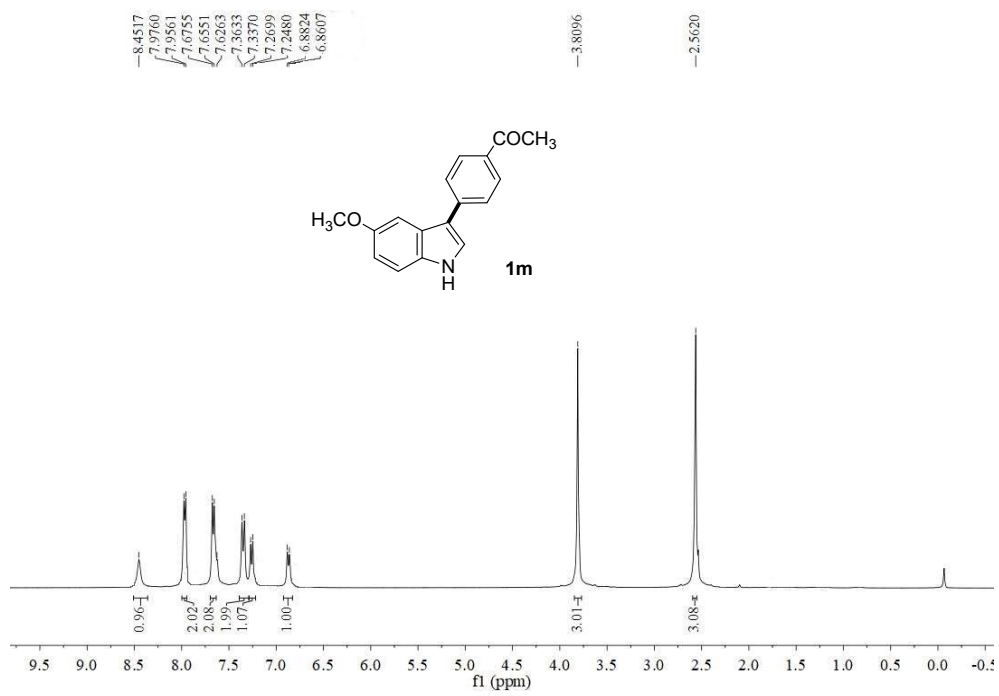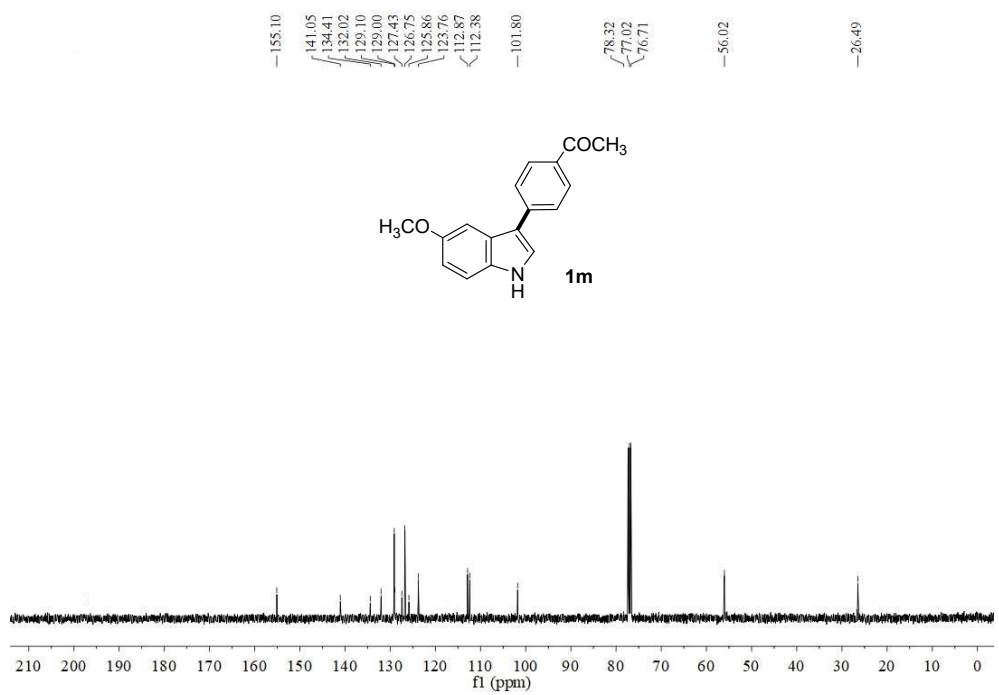

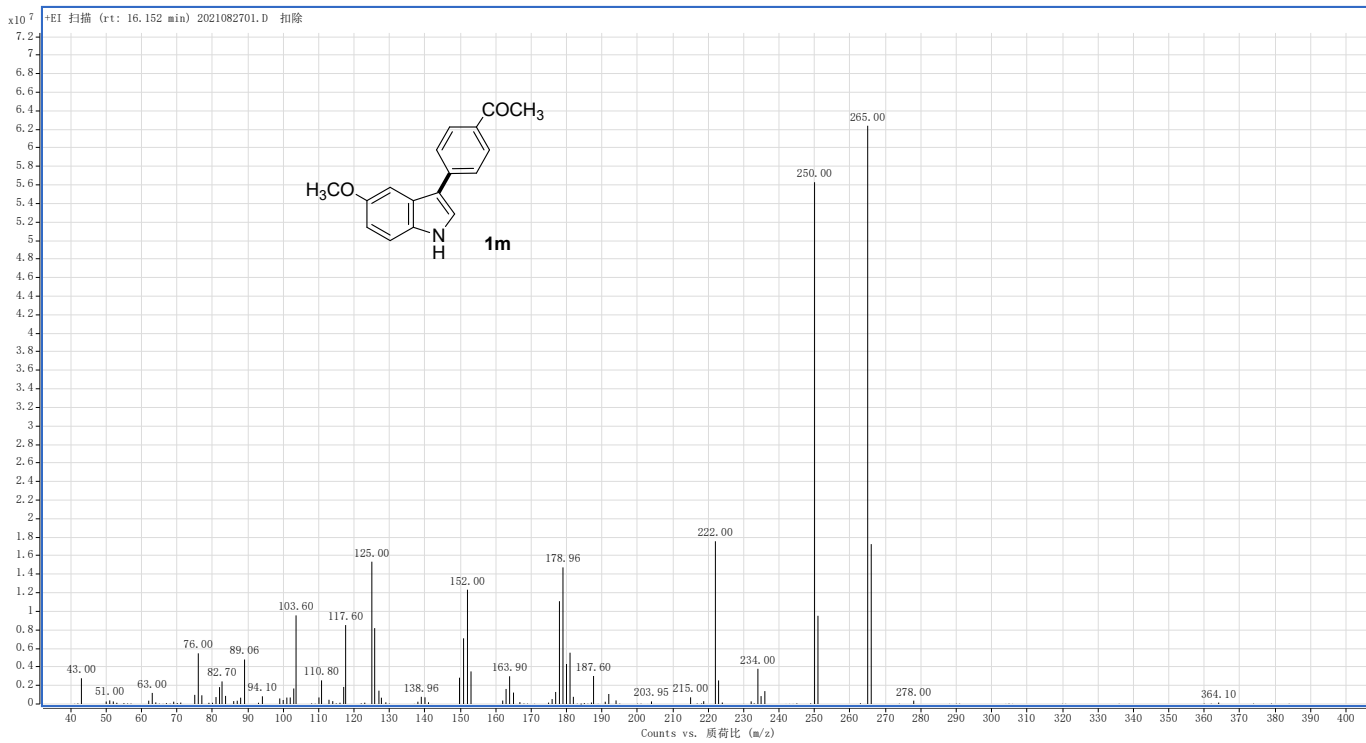

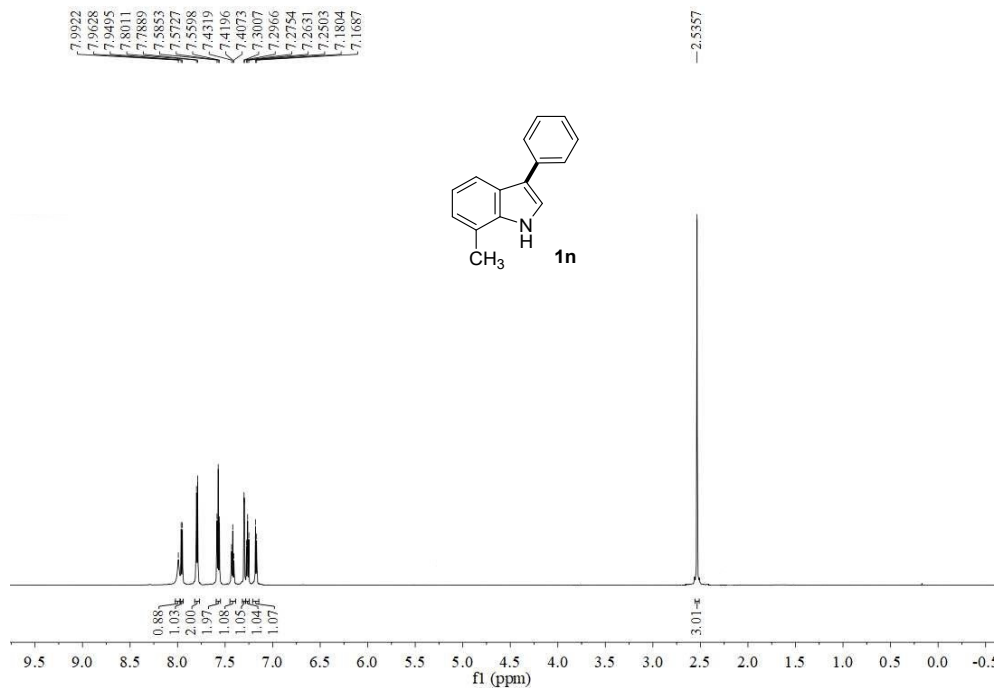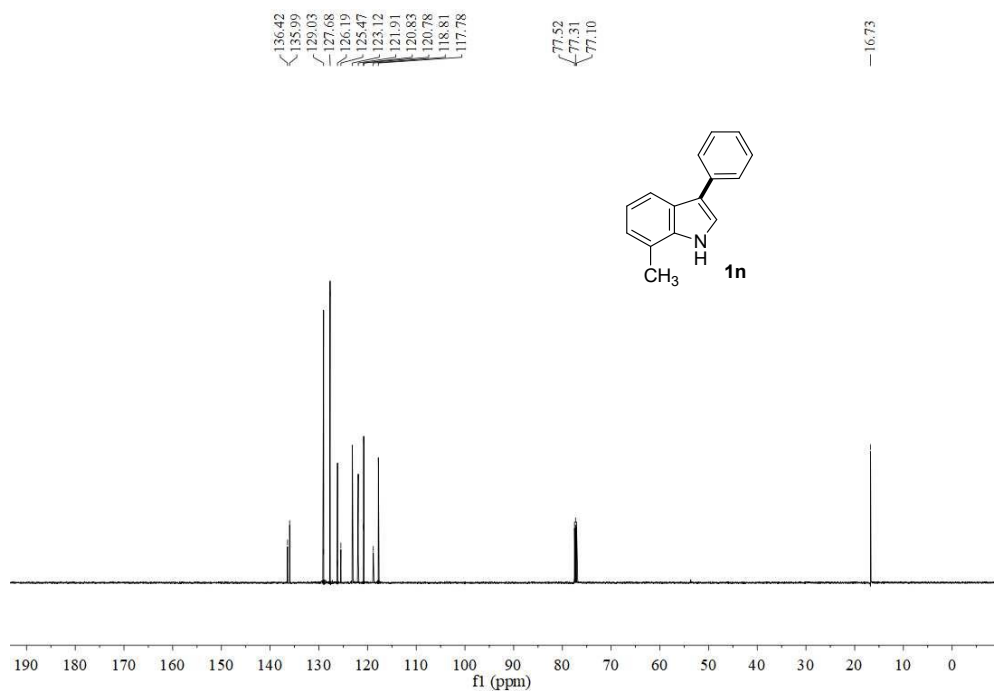



8.1383  
7.8004  
7.7964  
7.7904  
7.7831  
7.7795  
7.6570  
7.6536  
7.6367  
7.6207  
7.6178  
7.5973  
7.5941  
7.5823  
7.5762  
7.5688  
7.5579  
7.5579  
7.5303  
7.3875  
7.3717  
7.3694  
7.3500  
7.3196  
7.3010  
7.2809  
7.2012  
7.1613  
7.1555

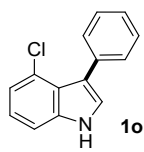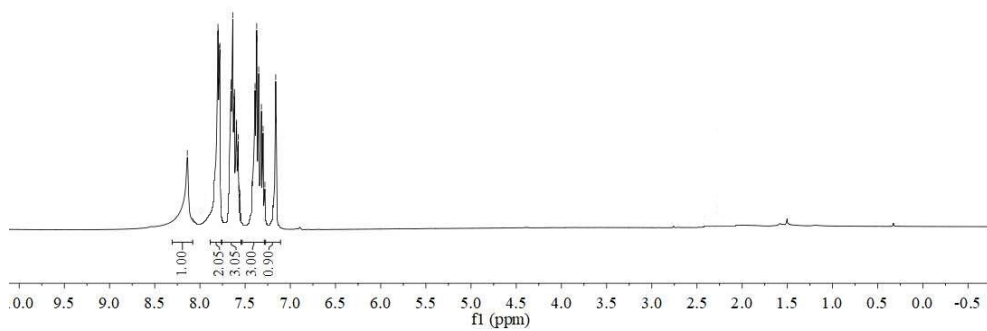

137.83  
135.57  
131.38  
127.92  
126.98  
126.62  
125.07  
123.42  
123.12  
121.66  
118.95  
110.73

77.93  
77.61  
77.29

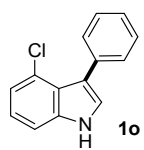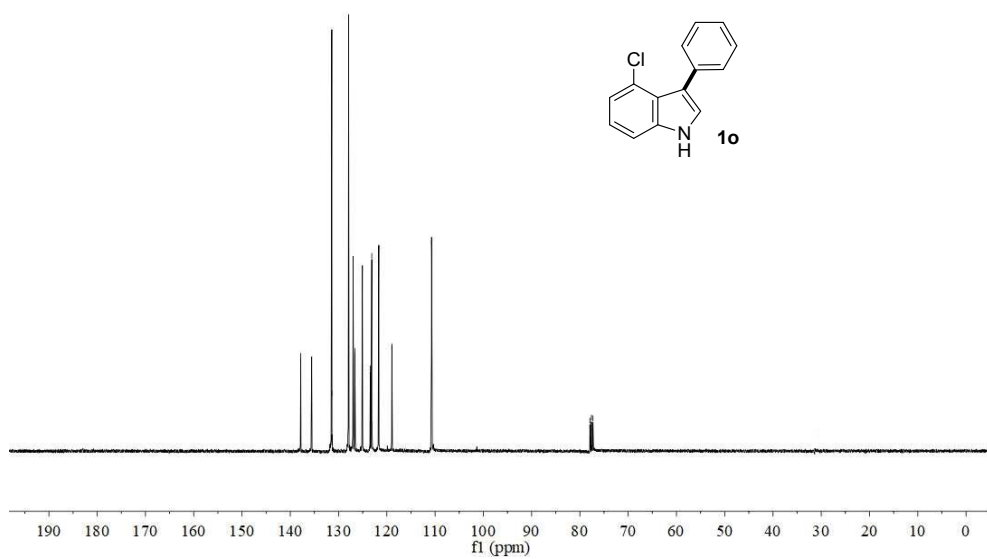

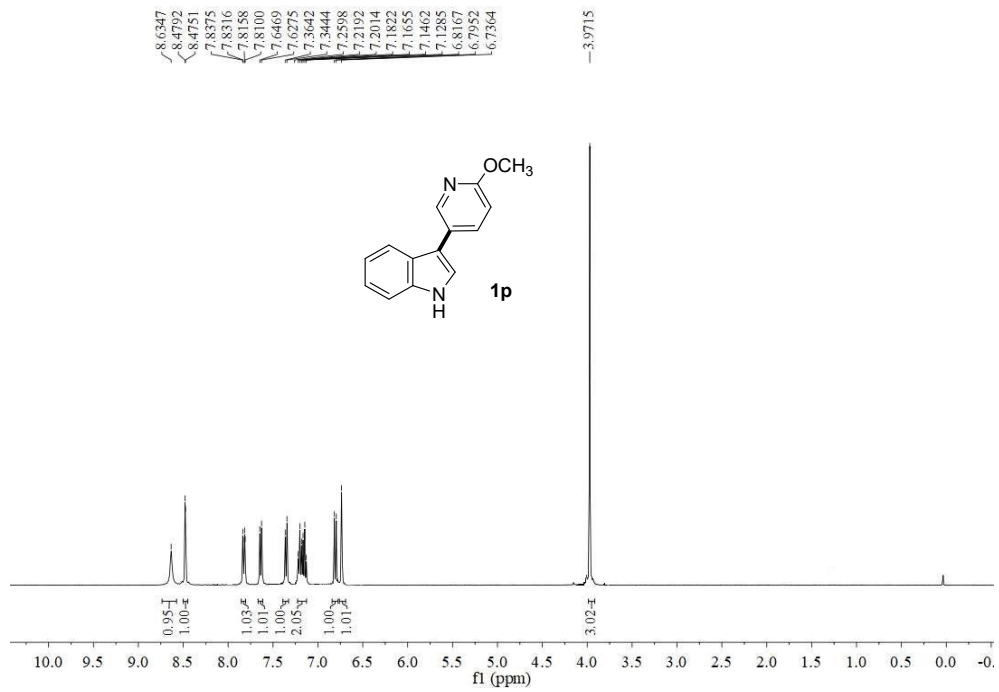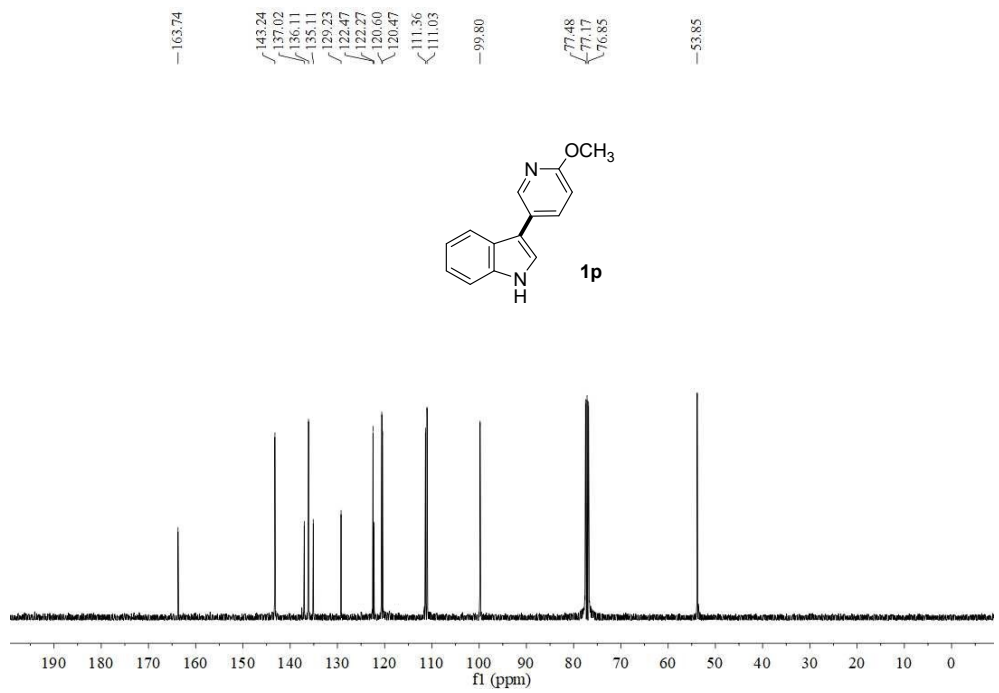

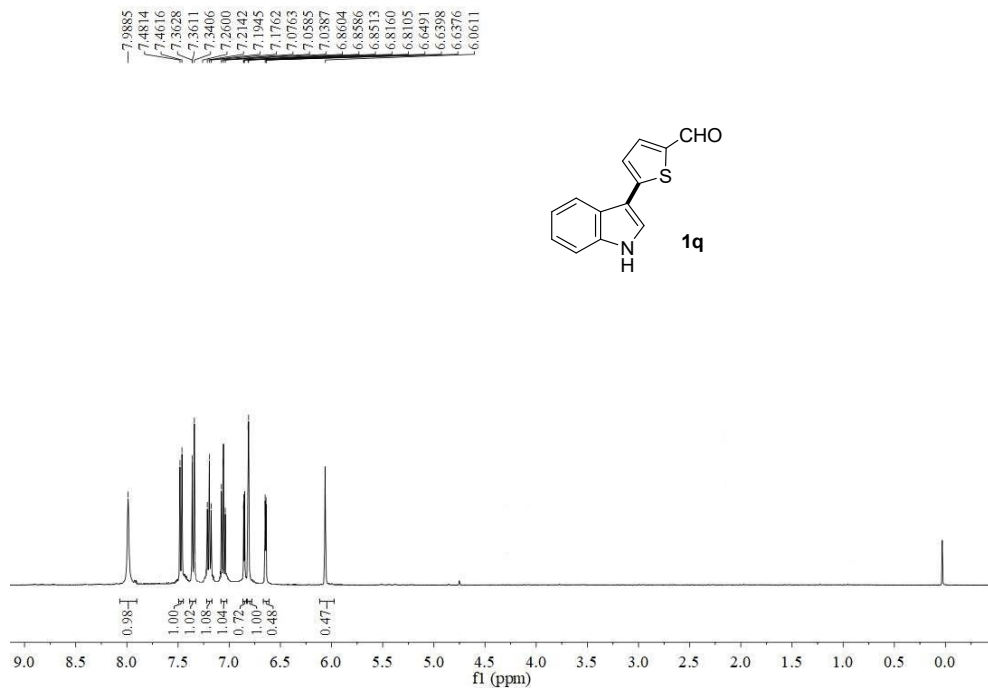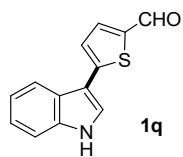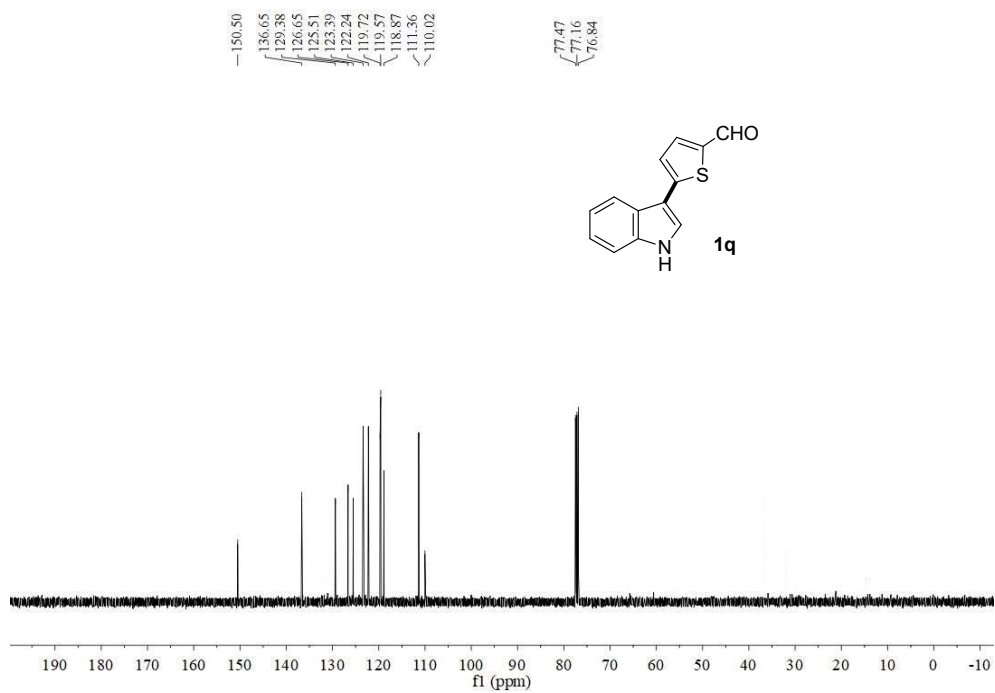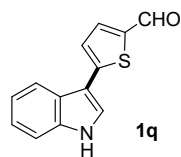

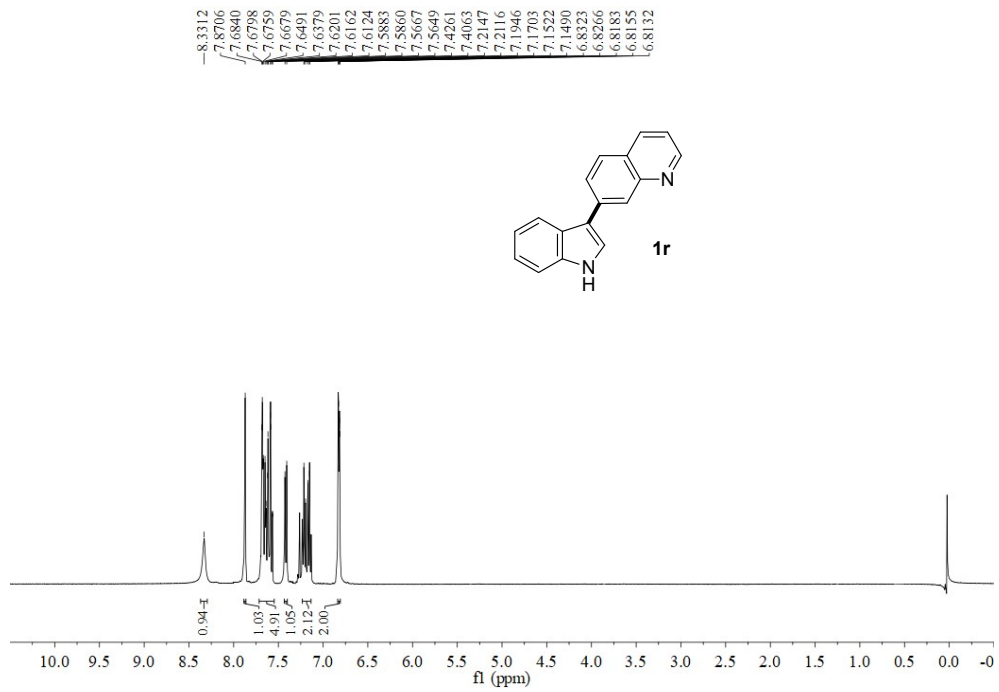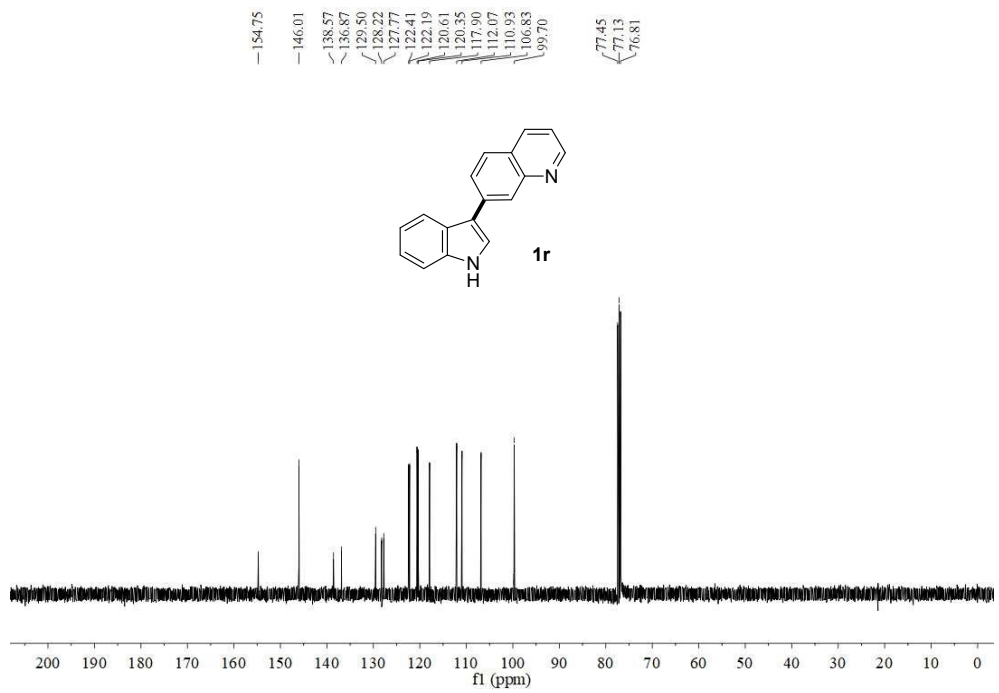

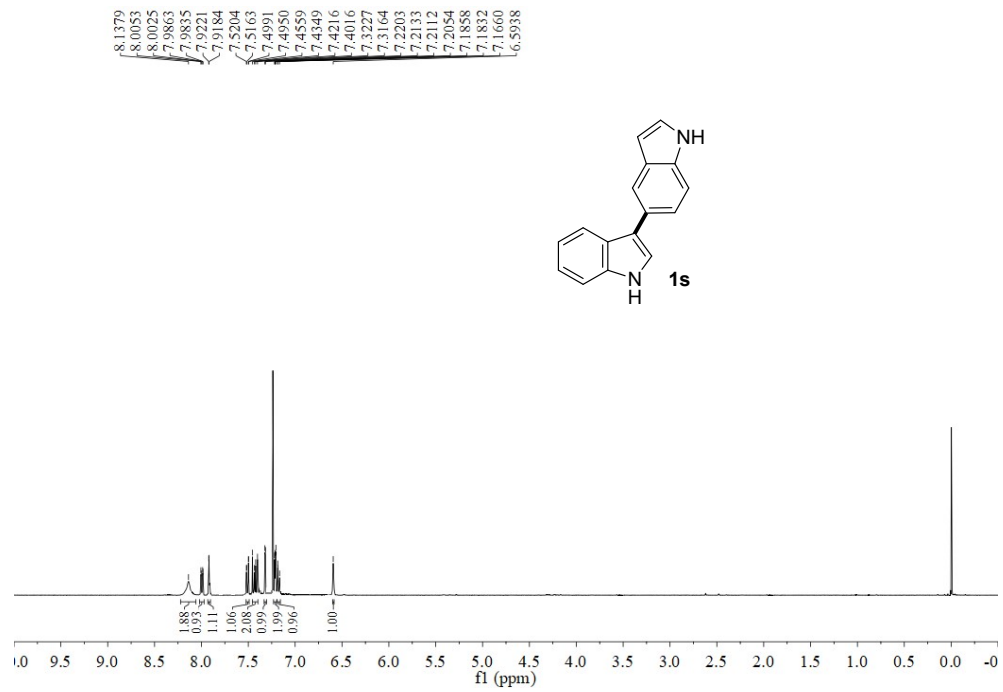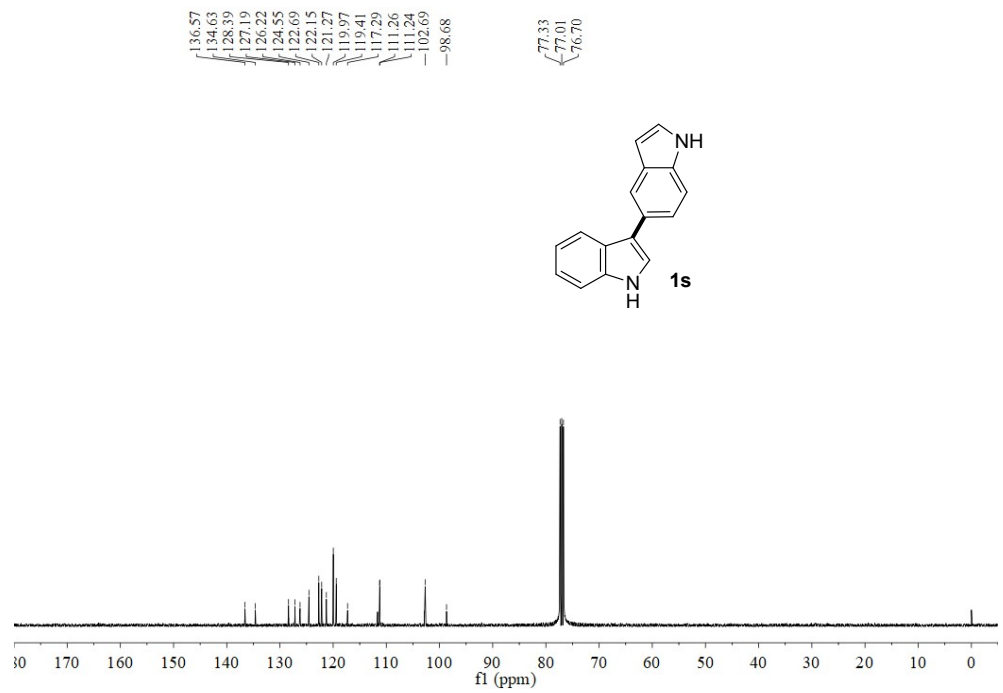

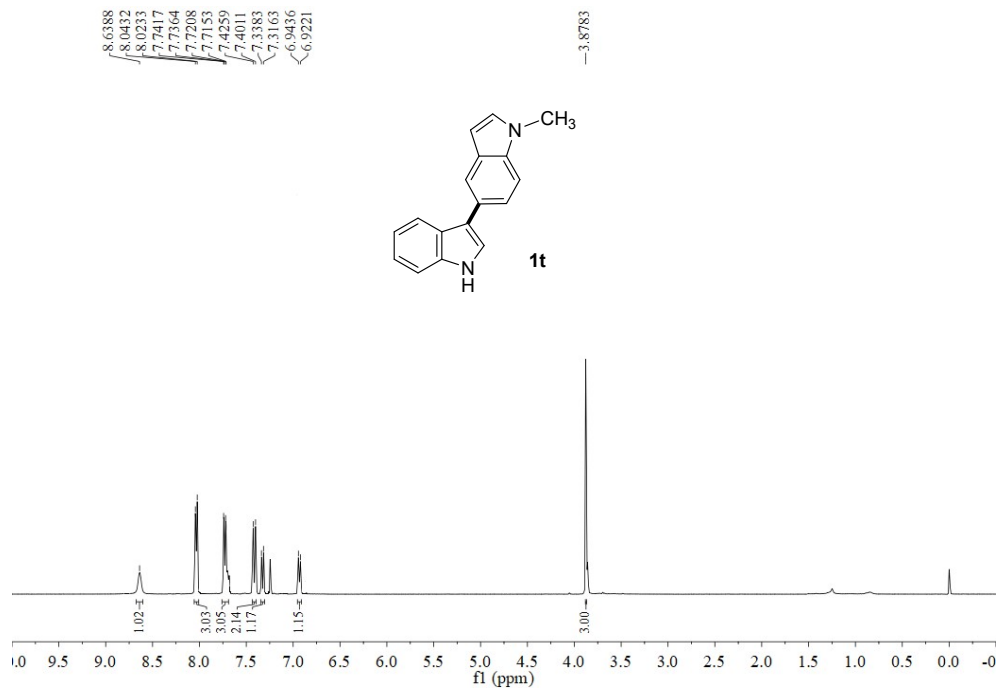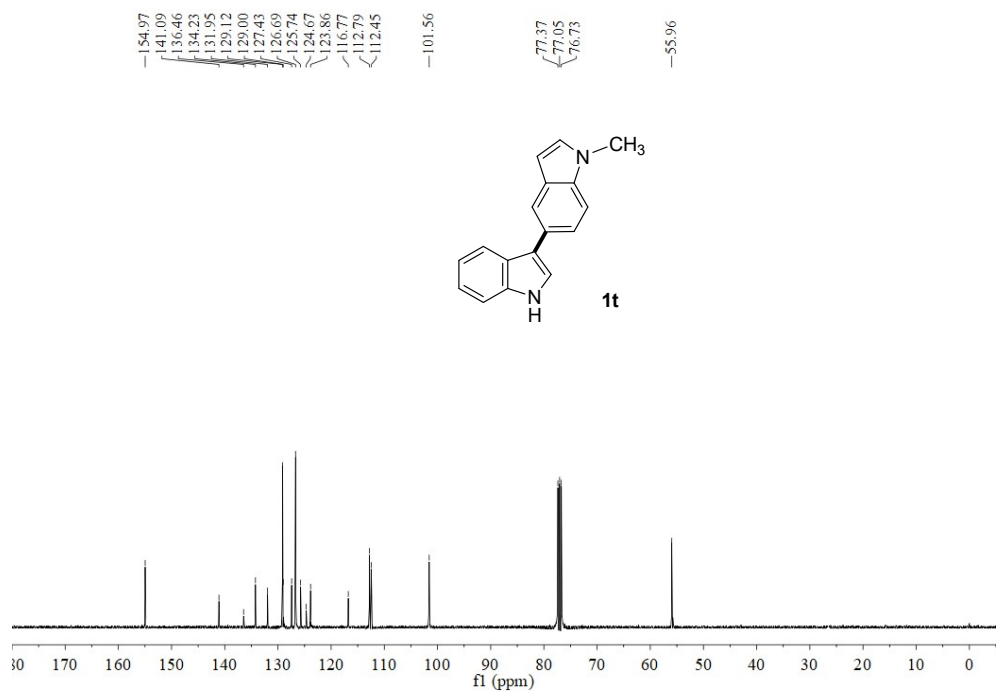

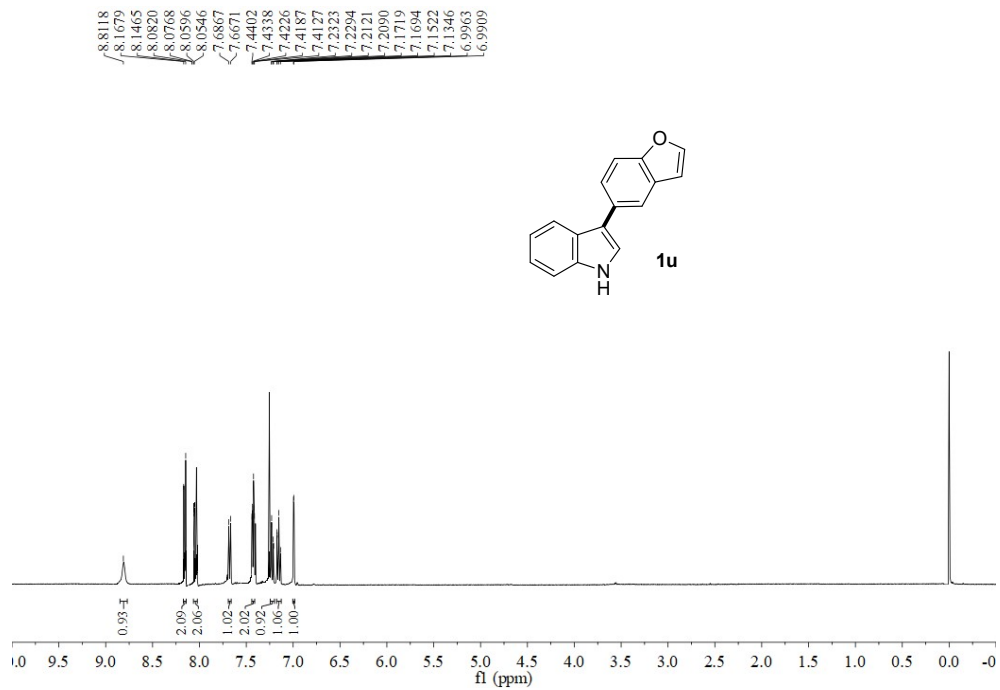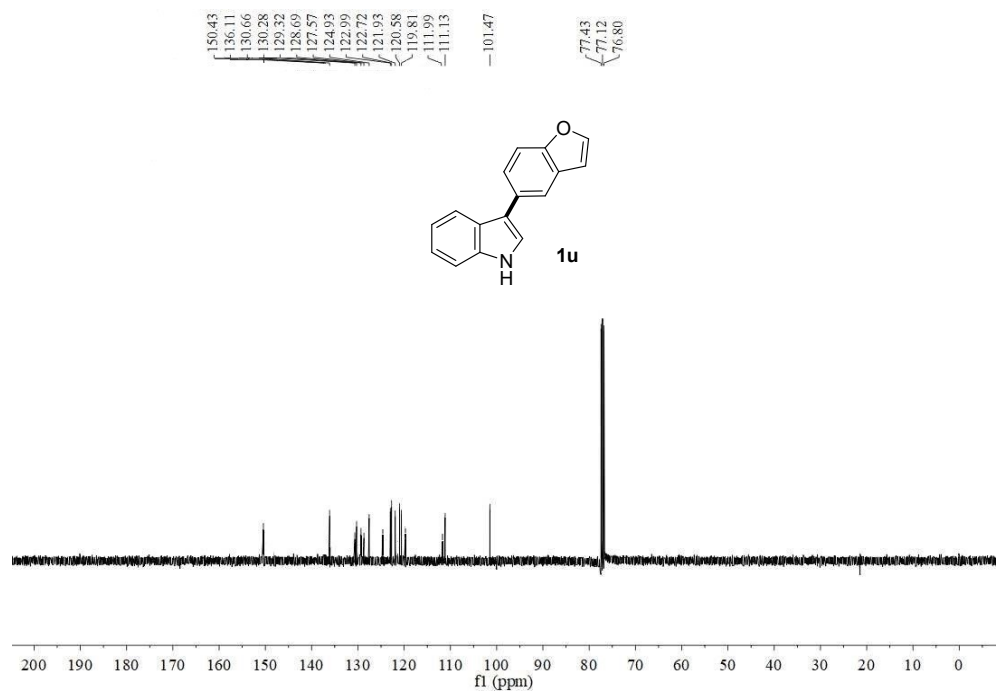

8.3204  
7.6843  
7.6668  
7.4806  
7.4624  
7.4436  
7.4229  
7.4033  
7.3670  
7.3485  
7.3309  
7.2623  
7.2457  
7.2280  
7.2086  
7.1767  
7.1586  
6.8577

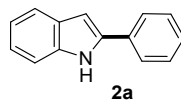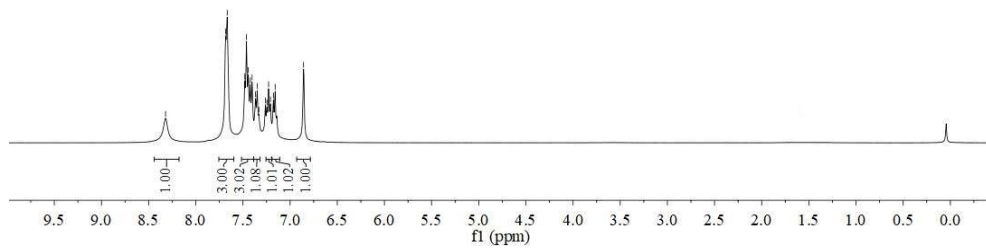

136.93  
132.43  
129.34  
129.04  
127.74  
125.22  
122.40  
120.71  
120.33  
110.97  
100.04

77.37  
77.05  
76.74

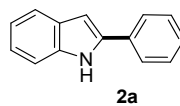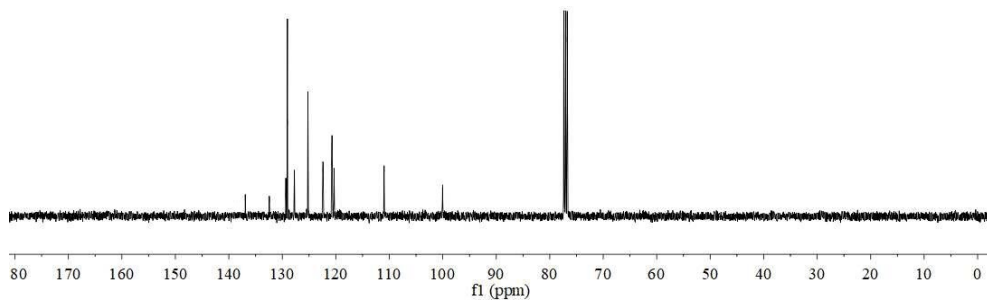



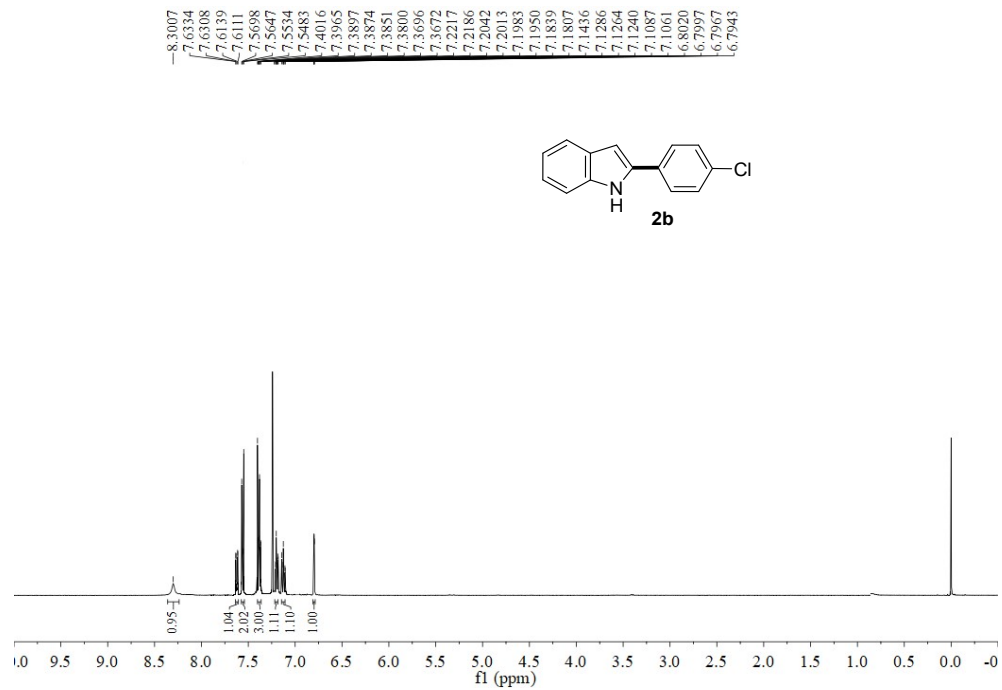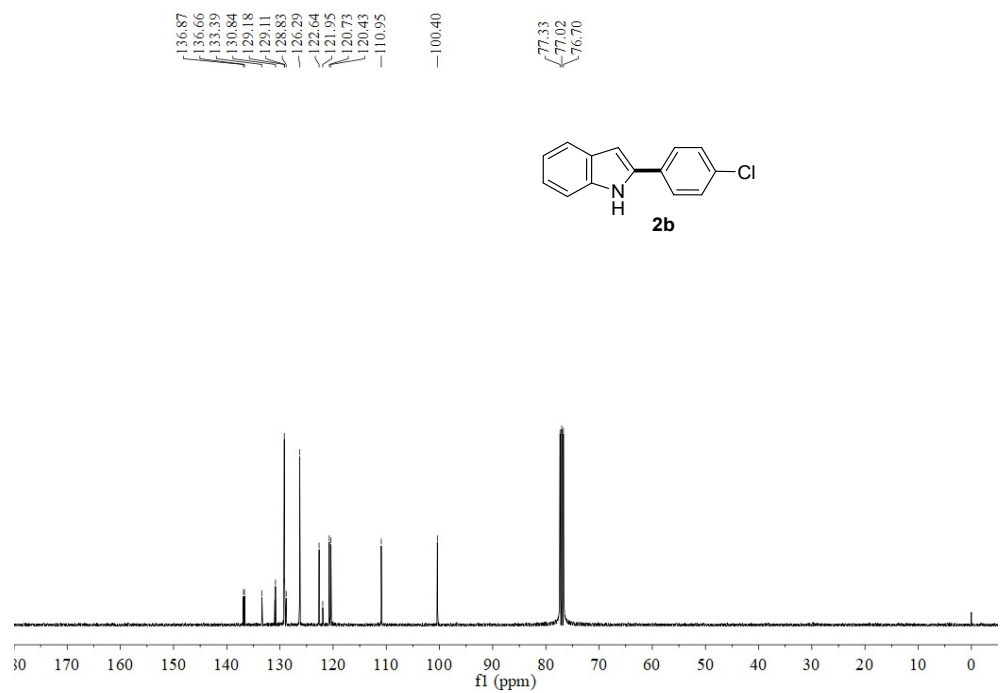

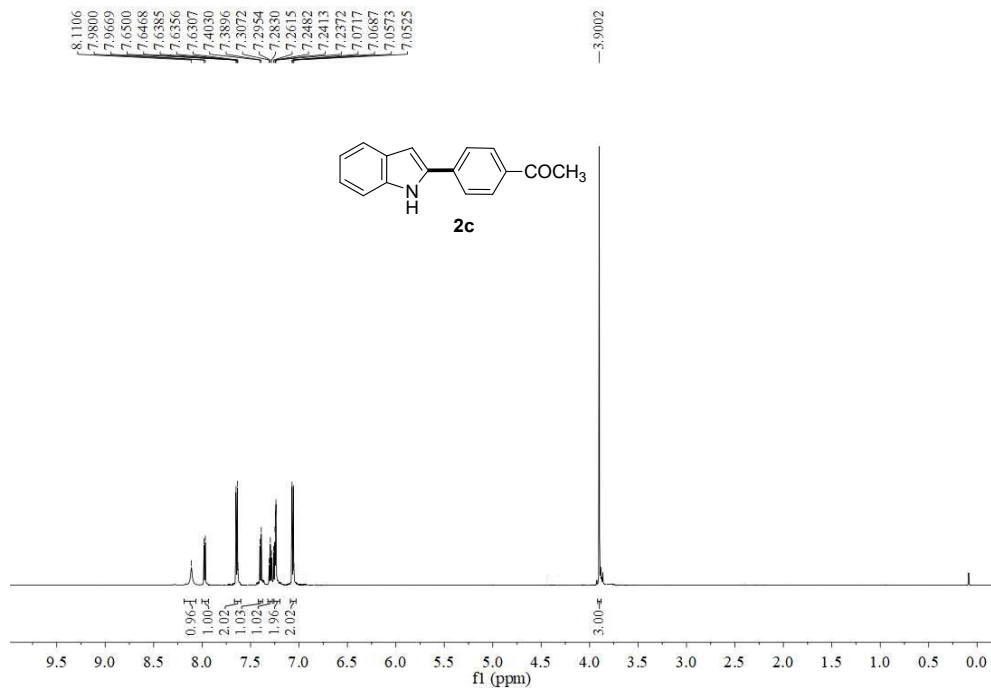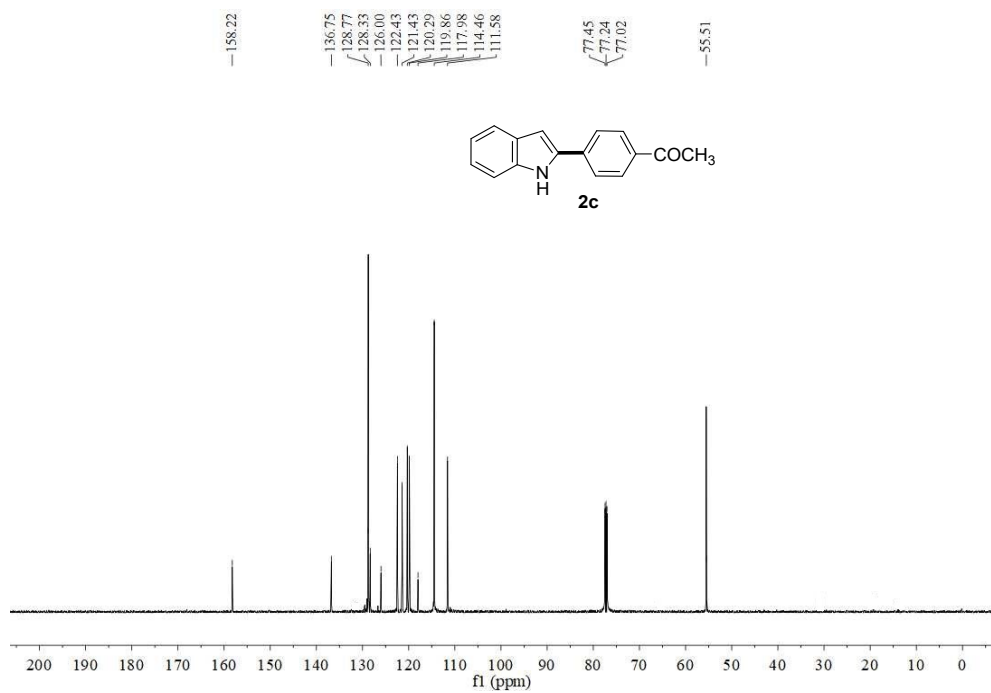

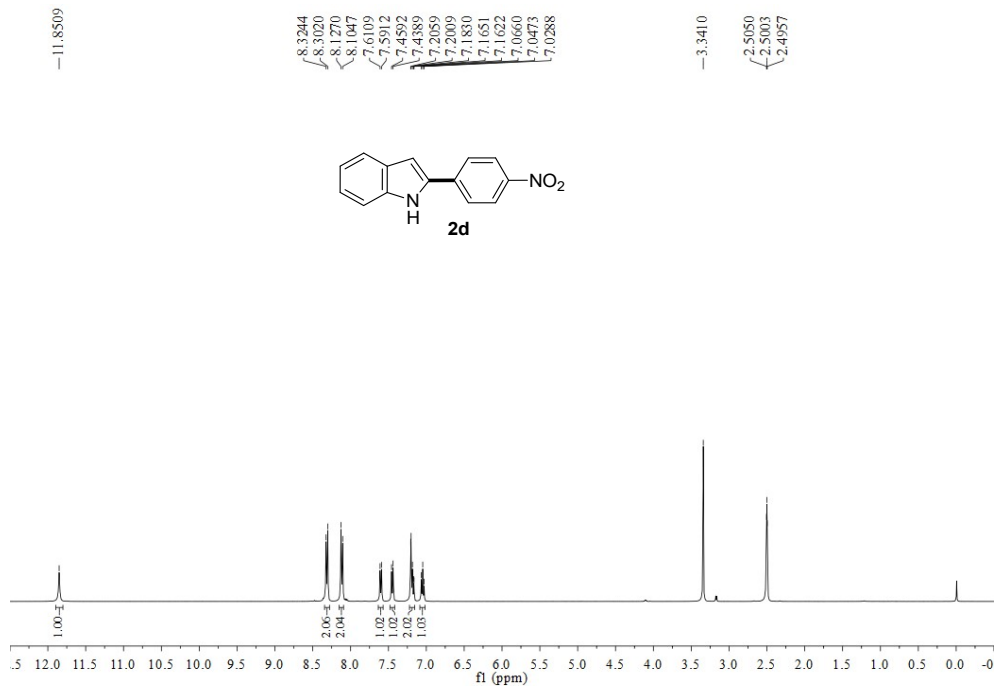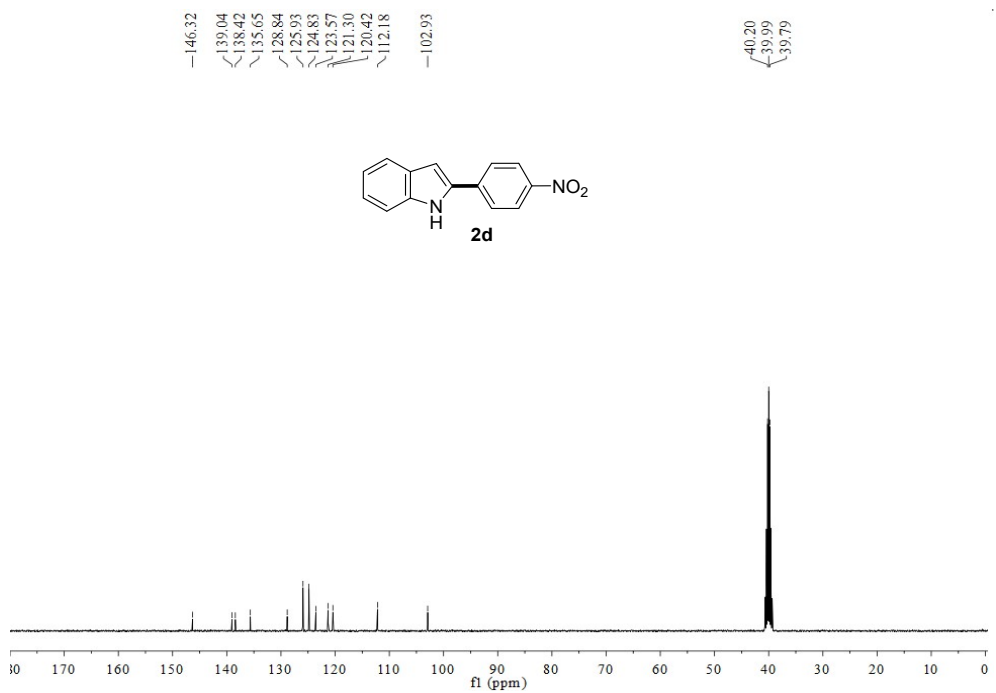

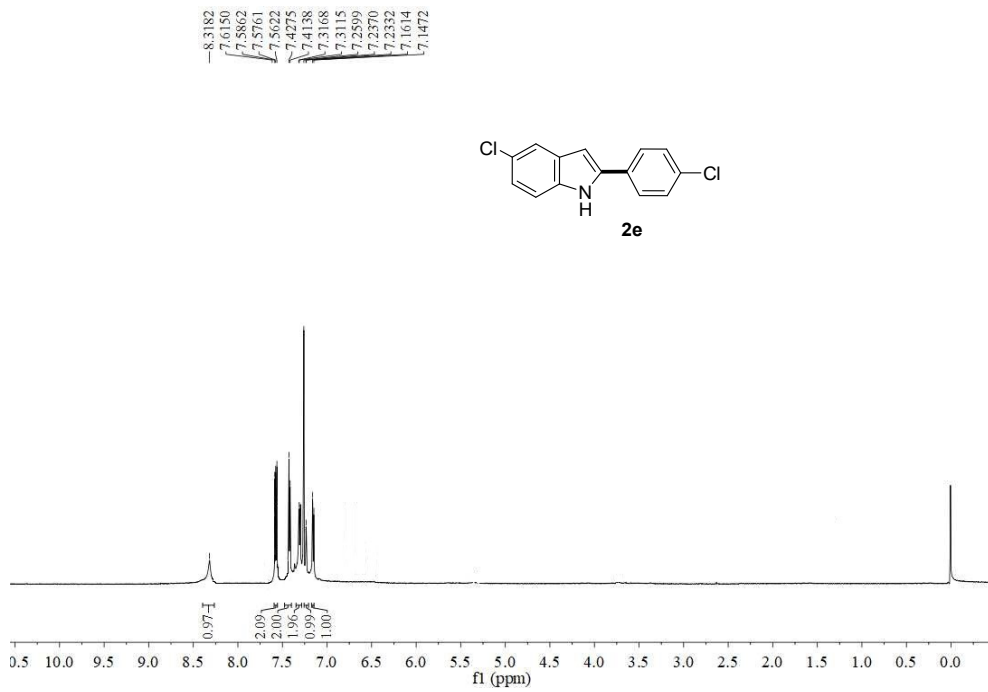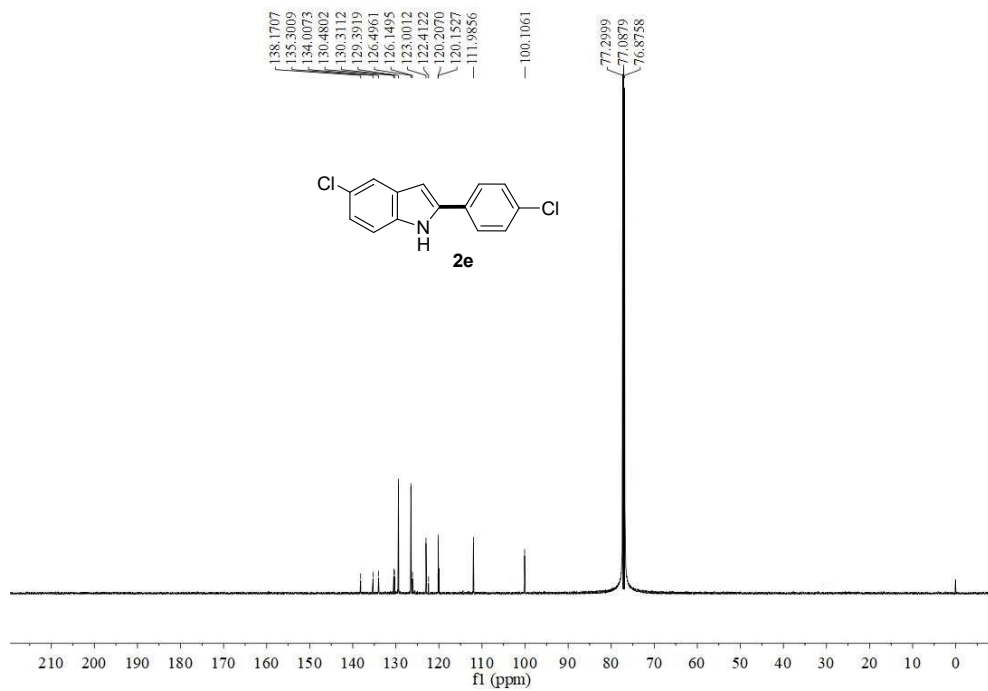

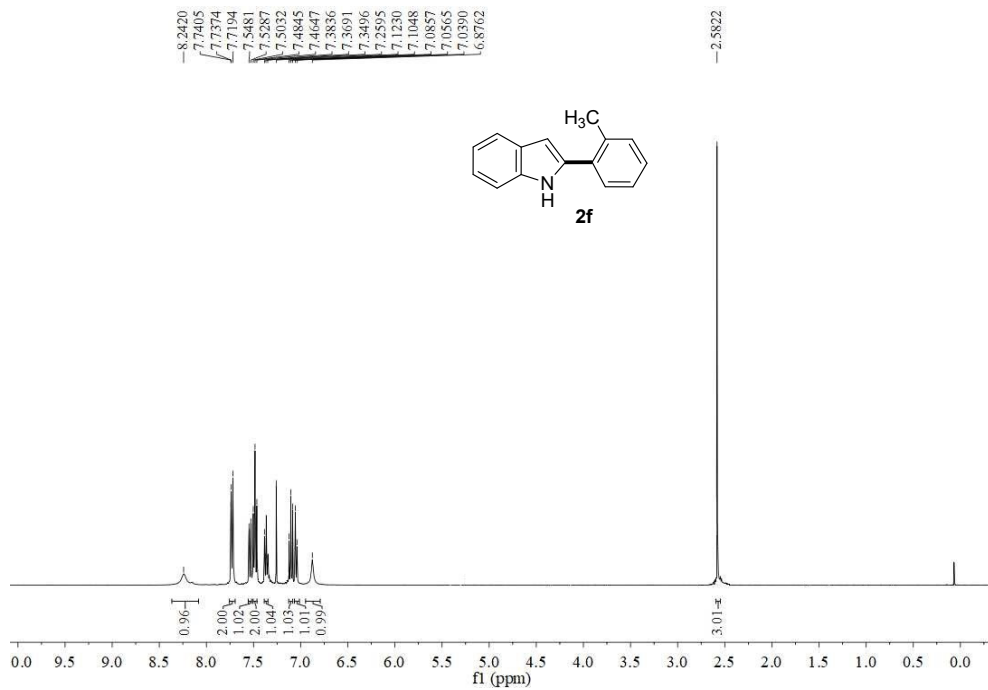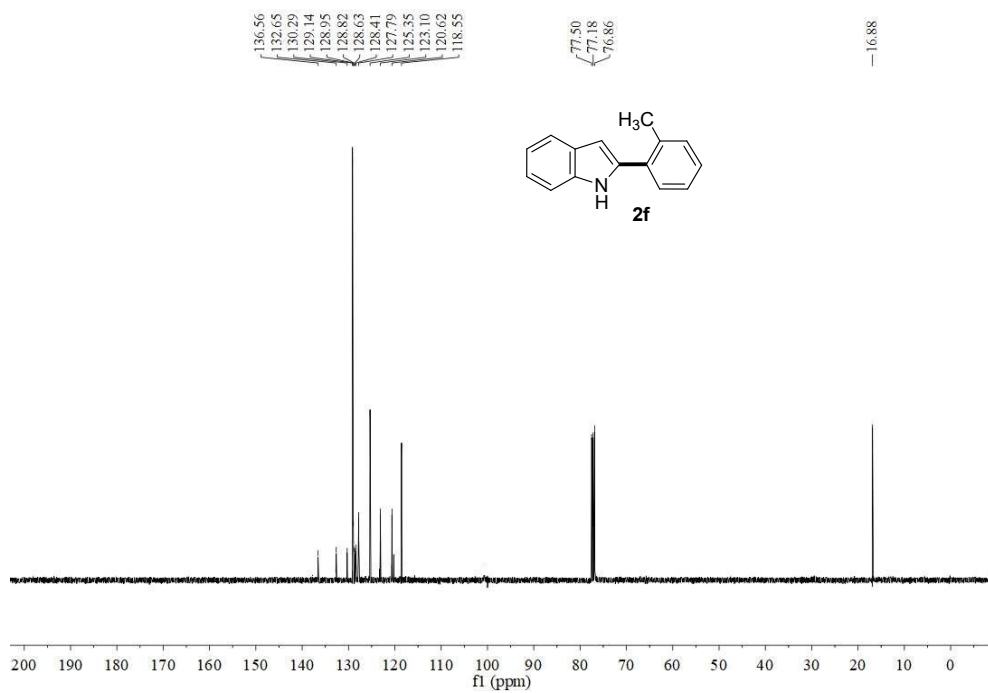

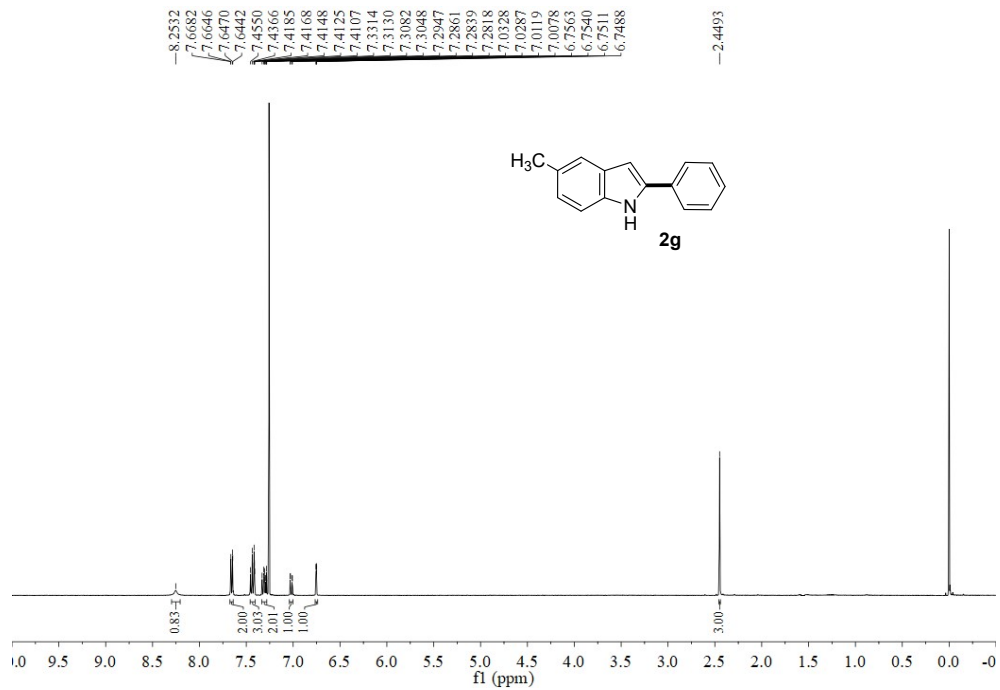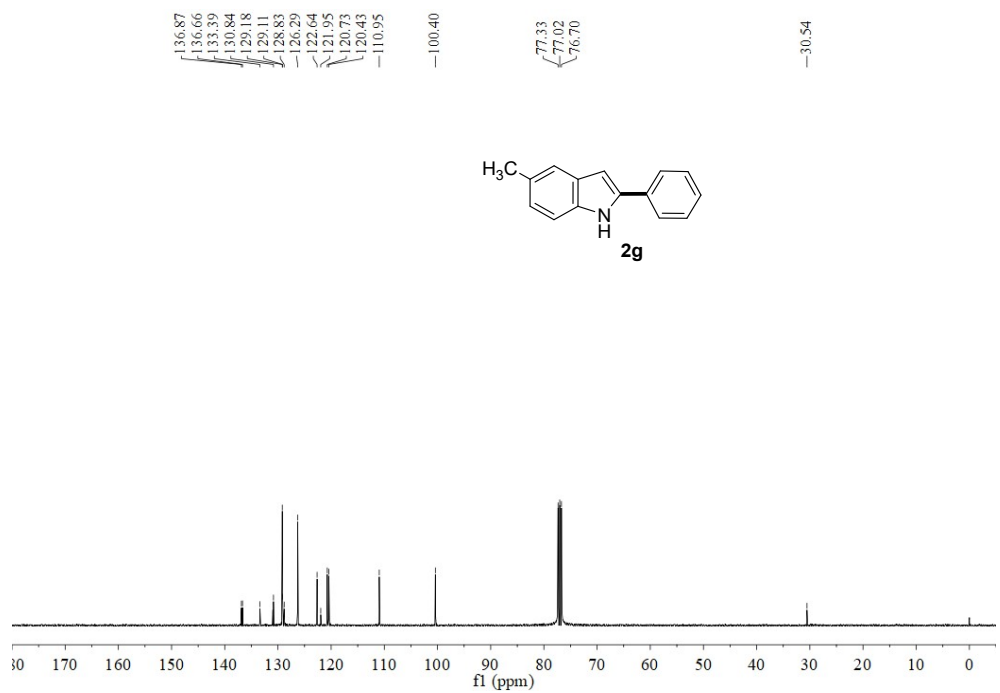

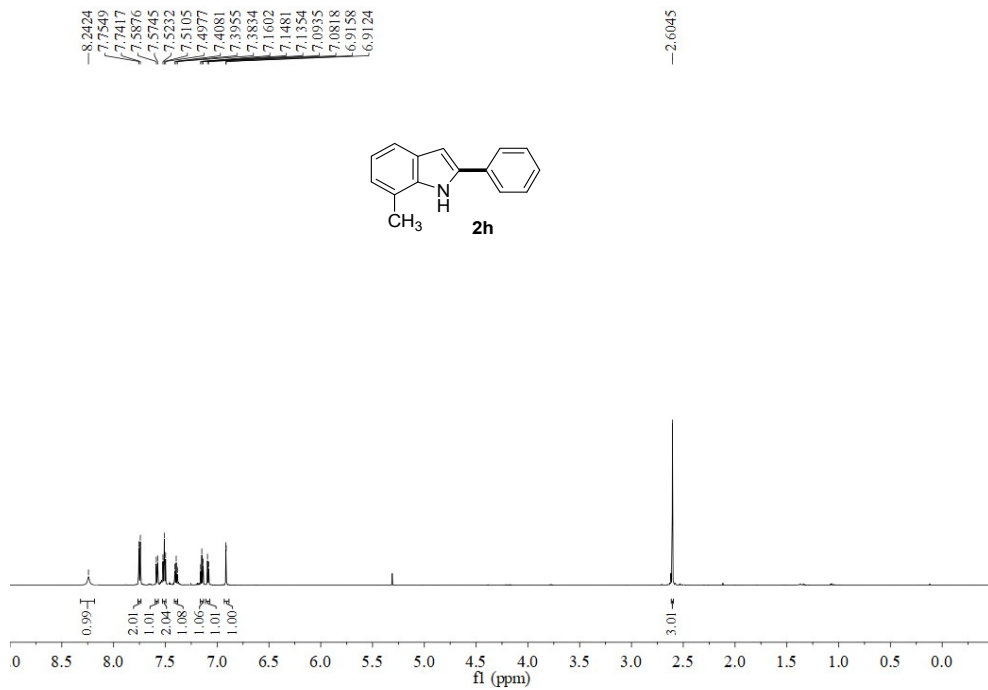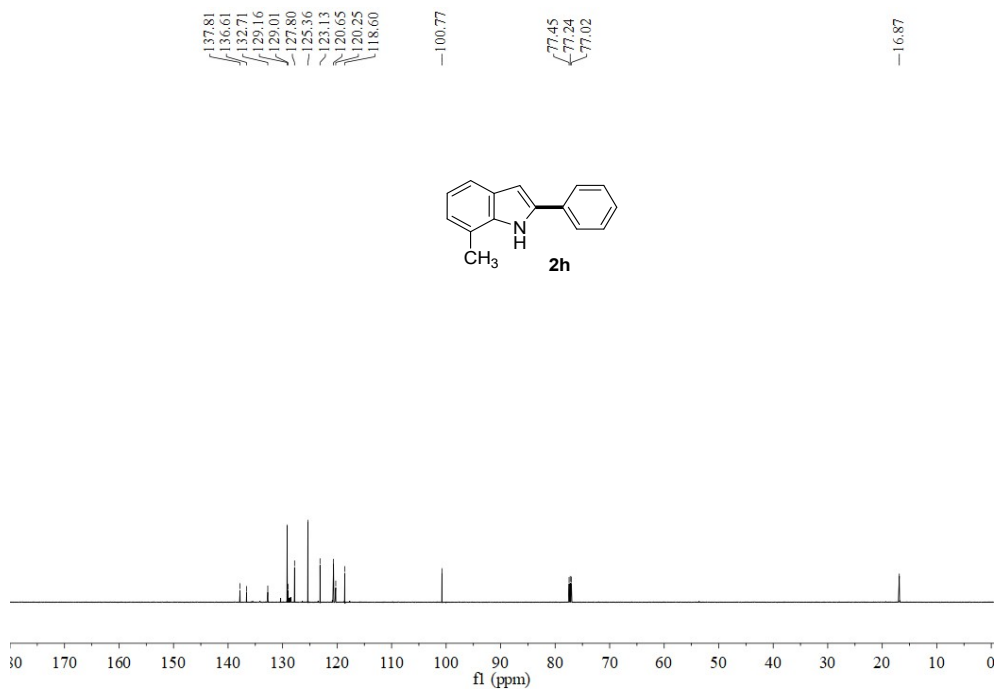

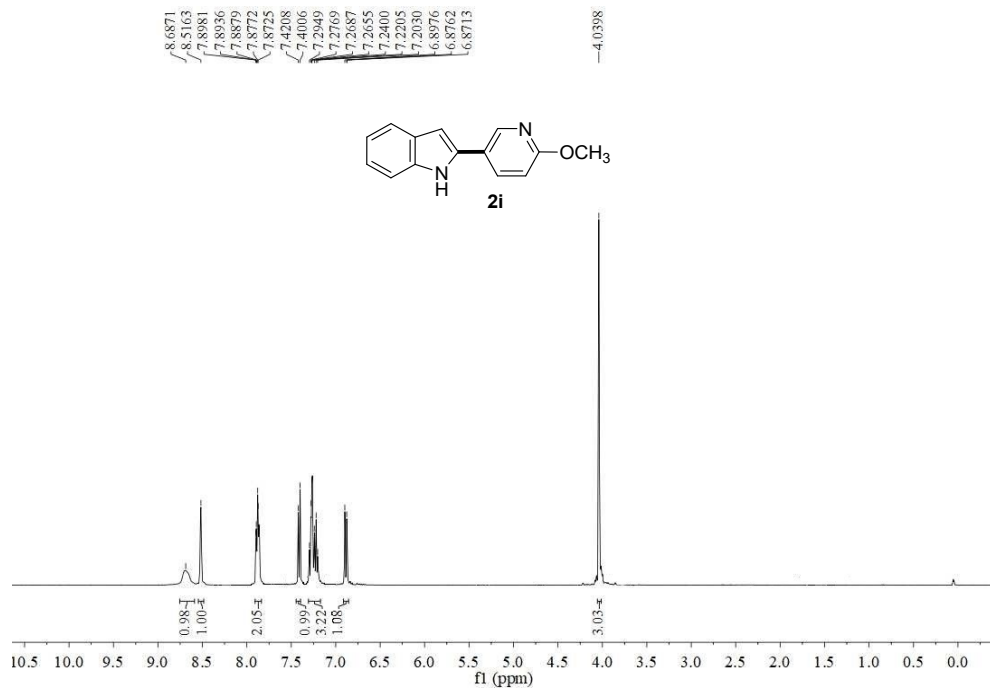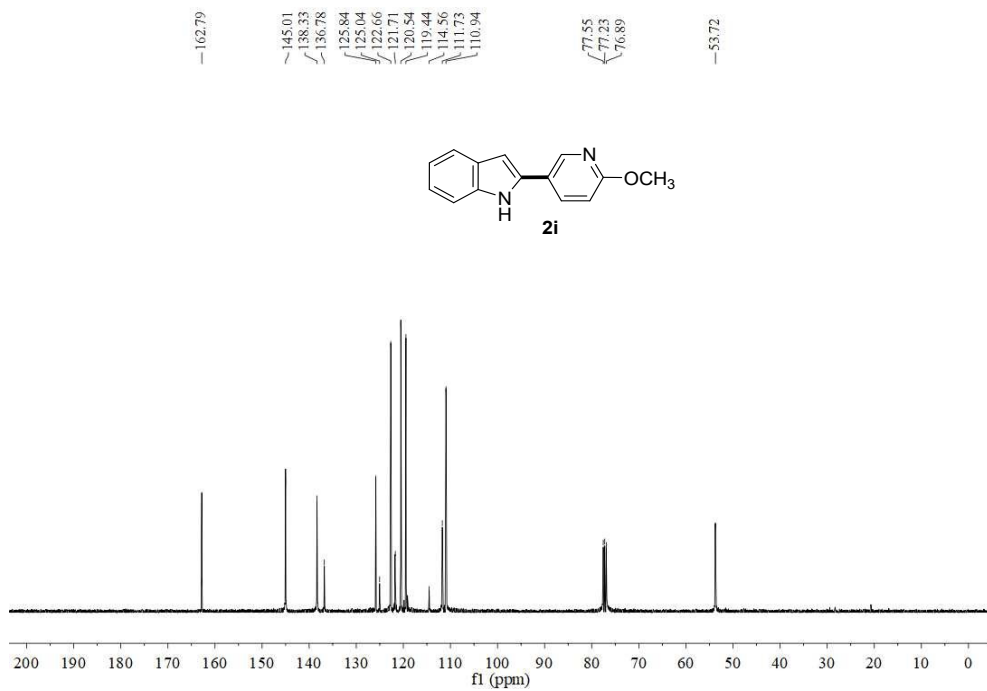

Supplement: d1nj03400f1.pdf [file d1nj03400f1.pdf]
